# Supplementary material for: Dramatic differences in the conformational equilibria of chalcogen-bridged compounds: the case of diallyl ether versus diallyl sulfide
Source: Royal Society of Chemistry journal article supplement (doi:10.1039/d1cp04591a), 2021-12-03
Supplement: d1cp04591a1.pdf [file d1cp04591a1.pdf]

## Electronic Supplementary Information

**Appendix 1:** Cartesian coordinates for the energy minima of DAS and DAE.

**Appendix 2:** Dihedral angle values for the conformers of DAS and DAE.

**Appendix 3:** Calculated energetic and spectroscopic parameters for the conformer I of DAS and conformers I–IX of DAE.

**Appendix 4:** Assigned transitions for the observed species of conformer I of DAS and conformers I–IX of DAE.

**Appendix 5:** Non-covalent interaction (NCI) isosurfaces for the conformers of DAS and DAE.

**Appendix 6:** Kraitchman coordinates of conformer I of DAS and DAE.

**Appendix 7:** Non-bond orbitals (NBO) results for conformer 1 of DAS and DAE and conformer XXIV and II of DAS and DAE, respectively.

**Appendix 8:** Geometries of conformers XXIV of DAS and conformer II of DAE.

**Appendix 1:** Cartesian coordinates for the energy minima of DAS and DAE.

**Table S1.** Cartesian coordinates of conformer I of DAS obtained at the B3LYP-D3(BJ)/aug-cc pVTZ level.

| <b>Cartesian Coordinates (Angstroms)</b> |           |           |           |
|------------------------------------------|-----------|-----------|-----------|
| <b>Atom</b>                              | <b>X</b>  | <b>Y</b>  | <b>Z</b>  |
| <b>S</b>                                 | -0.000018 | 1.534467  | 0.000003  |
| <b>C</b>                                 | 1.130406  | 0.354031  | 0.840024  |
| <b>H</b>                                 | 0.540902  | -0.321317 | 1.458241  |
| <b>H</b>                                 | 1.728935  | 0.986679  | 1.495733  |
| <b>C</b>                                 | -1.130415 | 0.354016  | -0.840026 |
| <b>H</b>                                 | -1.728952 | 0.986653  | -1.495736 |
| <b>H</b>                                 | -0.540898 | -0.321321 | -1.458244 |
| <b>C</b>                                 | 1.984608  | -0.389913 | -0.128009 |
| <b>H</b>                                 | 2.665132  | 0.213876  | -0.718336 |
| <b>C</b>                                 | 1.927950  | -1.702258 | -0.321241 |
| <b>H</b>                                 | 2.561567  | -2.195851 | -1.045172 |
| <b>H</b>                                 | 1.250613  | -2.326643 | 0.247540  |
| <b>C</b>                                 | -1.984606 | -0.389951 | 0.128000  |
| <b>H</b>                                 | -2.665159 | 0.213818  | 0.718313  |
| <b>C</b>                                 | -1.927902 | -1.702292 | 0.321244  |
| <b>H</b>                                 | -1.250536 | -2.326657 | -0.247523 |
| <b>H</b>                                 | -2.561512 | -2.195902 | 1.045170  |

**Table S2.** Cartesian coordinates of conformer I of DAE obtained at the B3LYP-D3(BJ)/aug-cc pVTZ level.

---

| Cartesian Coordinates (Angstroms) |           |           |           |
|-----------------------------------|-----------|-----------|-----------|
| Atom                              | X         | Y         | Z         |
| C                                 | 0.951237  | 0.658573  | -0.728515 |
| C                                 | 1.908250  | -0.067827 | 0.167553  |
| C                                 | 2.104291  | -1.379080 | 0.141217  |
| H                                 | 2.818512  | -1.863011 | 0.793678  |
| H                                 | 1.557450  | -2.014763 | -0.544968 |
| H                                 | 2.454832  | 0.551571  | 0.871543  |
| O                                 | 0.000001  | 1.433724  | 0.000001  |
| C                                 | -0.951236 | 0.658573  | 0.728515  |
| C                                 | -1.908249 | -0.067826 | -0.167554 |
| C                                 | -2.104293 | -1.379078 | -0.141217 |
| H                                 | -2.818515 | -1.863008 | -0.793679 |
| H                                 | -1.557455 | -2.014762 | 0.544969  |
| H                                 | -2.454829 | 0.551573  | -0.871545 |
| H                                 | -1.485574 | 1.384296  | 1.343287  |
| H                                 | -0.448682 | -0.048688 | 1.395505  |
| H                                 | 0.448682  | -0.048687 | -1.395505 |
| H                                 | 1.485575  | 1.384296  | -1.343286 |

---

**Table S3.** Cartesian coordinates of conformer II of DAE obtained at the B3LYP-D3(BJ)/aug-cc pVTZ level.

---

| Cartesian Coordinates (Angstroms) |           |           |           |
|-----------------------------------|-----------|-----------|-----------|
| Atom                              | X         | Y         | Z         |
| C                                 | -1.174844 | -0.965856 | 0.000008  |
| C                                 | -2.392997 | -0.102340 | 0.000003  |
| C                                 | -2.396585 | 1.222526  | -0.000007 |
| H                                 | -3.324380 | 1.777173  | -0.000009 |
| H                                 | -1.474457 | 1.785213  | -0.000012 |
| H                                 | -3.329093 | -0.651009 | 0.000008  |
| O                                 | 0.000000  | -0.188737 | -0.000004 |
| C                                 | 1.174844  | -0.965856 | -0.000004 |
| C                                 | 2.392997  | -0.102340 | -0.000005 |
| C                                 | 2.396585  | 1.222526  | 0.000009  |
| H                                 | 3.324380  | 1.777173  | 0.000007  |
| H                                 | 1.474457  | 1.785213  | 0.000020  |
| H                                 | 3.329093  | -0.651009 | -0.000018 |
| H                                 | 1.193118  | -1.625632 | -0.881078 |
| H                                 | 1.193120  | -1.625630 | 0.881071  |
| H                                 | -1.193122 | -1.625640 | -0.881060 |
| H                                 | -1.193116 | -1.625622 | 0.881089  |

---

**Table S4.** Cartesian coordinates of conformer III of DAE obtained at the B3LYP-D3(BJ)/aug-cc pVTZ level.

---

| Cartesian Coordinates (Angstroms) |           |           |           |
|-----------------------------------|-----------|-----------|-----------|
| Atom                              | X         | Y         | Z         |
| C                                 | -0.737051 | -0.602201 | 0.387824  |
| C                                 | -2.190651 | -0.715259 | 0.067135  |
| C                                 | -2.949890 | 0.252462  | -0.425890 |
| H                                 | -3.997796 | 0.086870  | -0.633597 |
| H                                 | -2.543823 | 1.231815  | -0.633823 |
| H                                 | -2.616404 | -1.692760 | 0.269330  |
| O                                 | -0.257777 | 0.696793  | 0.107506  |
| C                                 | 1.117697  | 0.876225  | 0.418043  |
| C                                 | 2.028572  | 0.135008  | -0.514231 |
| C                                 | 2.964731  | -0.719291 | -0.124866 |
| H                                 | 3.614331  | -1.215591 | -0.832975 |
| H                                 | 3.119730  | -0.946060 | 0.923389  |
| H                                 | 1.882499  | 0.341643  | -1.569640 |
| H                                 | 1.317149  | 0.581950  | 1.456070  |
| H                                 | 1.287734  | 1.950822  | 0.333179  |
| H                                 | -0.176374 | -1.354135 | -0.183144 |
| H                                 | -0.575096 | -0.838514 | 1.450965  |

---

**Table S5.** Cartesian coordinates of conformer IV of DAE obtained at the B3LYP-D3(BJ)/aug-cc pVTZ level.

---

| Cartesian Coordinates (Angstroms) |           |           |           |
|-----------------------------------|-----------|-----------|-----------|
| Atom                              | X         | Y         | Z         |
| C                                 | -1.228332 | -0.913448 | -0.057890 |
| C                                 | -2.527804 | -0.178843 | -0.102289 |
| C                                 | -2.669417 | 1.136665  | -0.032140 |
| H                                 | -3.648069 | 1.594105  | -0.071784 |
| H                                 | -1.812455 | 1.787420  | 0.065257  |
| H                                 | -3.399139 | -0.817845 | -0.201740 |
| O                                 | -0.144569 | -0.023112 | 0.078636  |
| C                                 | 1.109858  | -0.684031 | 0.129914  |
| C                                 | 2.181863  | 0.326119  | 0.370094  |
| C                                 | 3.269458  | 0.449761  | -0.376849 |
| H                                 | 4.035385  | 1.177656  | -0.147359 |
| H                                 | 3.433987  | -0.177248 | -1.244739 |
| H                                 | 2.029124  | 0.971768  | 1.228019  |
| H                                 | 1.295540  | -1.229206 | -0.803913 |
| H                                 | 1.098441  | -1.420484 | 0.947088  |
| H                                 | -1.114783 | -1.512580 | -0.974572 |
| H                                 | -1.238483 | -1.628751 | 0.779195  |

---

**Table S6.** Cartesian coordinates of conformer V of DAE obtained at the B3LYP-D3(BJ)/aug-cc pVTZ level.

---

| Cartesian Coordinates (Angstroms) |           |           |           |
|-----------------------------------|-----------|-----------|-----------|
| Atom                              | X         | Y         | Z         |
| C                                 | 0.801939  | 0.047352  | -0.457011 |
| C                                 | 2.254698  | -0.139749 | -0.172173 |
| C                                 | 3.056900  | 0.821405  | 0.262938  |
| H                                 | 4.111534  | 0.648997  | 0.428219  |
| H                                 | 2.685600  | 1.818595  | 0.466017  |
| H                                 | 2.642673  | -1.135578 | -0.357059 |
| O                                 | 0.069118  | -0.959411 | 0.232398  |
| C                                 | -1.319421 | -0.961239 | -0.074589 |
| C                                 | -2.043206 | 0.225904  | 0.486635  |
| C                                 | -2.778280 | 1.063362  | -0.231810 |
| H                                 | -3.298858 | 1.897068  | 0.219526  |
| H                                 | -2.891707 | 0.937456  | -1.302119 |
| H                                 | -1.933880 | 0.374952  | 1.556117  |
| H                                 | -1.705261 | -1.880640 | 0.368974  |
| H                                 | -1.470138 | -1.016914 | -1.160261 |
| H                                 | 0.613869  | -0.050946 | -1.536551 |
| H                                 | 0.475100  | 1.047610  | -0.156407 |

---

**Table S7.** Cartesian coordinates of conformer VI of DAE obtained at the B3LYP-D3(BJ)/aug-cc pVTZ level.

---

| Cartesian Coordinates (Angstroms) |           |           |           |
|-----------------------------------|-----------|-----------|-----------|
| Atom                              | X         | Y         | Z         |
| C                                 | 0.792343  | 0.290562  | 0.164004  |
| C                                 | 2.152749  | 0.187656  | -0.439228 |
| C                                 | 3.281255  | 0.398572  | 0.223134  |
| H                                 | 4.244422  | 0.343725  | -0.265245 |
| H                                 | 3.280720  | 0.638327  | 1.279545  |
| H                                 | 2.176156  | -0.063966 | -1.494002 |
| O                                 | 0.080989  | -0.912785 | -0.105572 |
| C                                 | -1.259606 | -0.897063 | 0.370628  |
| C                                 | -2.147743 | 0.021561  | -0.413582 |
| C                                 | -2.874768 | 0.995457  | 0.116704  |
| H                                 | -3.518008 | 1.621128  | -0.487076 |
| H                                 | -2.857284 | 1.195458  | 1.181583  |
| H                                 | -2.172204 | -0.156285 | -1.484021 |
| H                                 | -1.284966 | -0.631134 | 1.434820  |
| H                                 | -1.604876 | -1.927540 | 0.272097  |
| H                                 | 0.254508  | 1.144198  | -0.266908 |
| H                                 | 0.860235  | 0.454574  | 1.246818  |

---



**Table S8.** Cartesian coordinates of conformer VII of DAE obtained at the B3LYP-D3(BJ)/aug-cc pVTZ level.

---

| Cartesian Coordinates (Angstroms) |           |           |           |
|-----------------------------------|-----------|-----------|-----------|
| Atom                              | X         | Y         | Z         |
| C                                 | -0.772147 | -0.520924 | 0.738068  |
| C                                 | -2.095122 | 0.134322  | 0.519154  |
| C                                 | -2.529472 | 0.623558  | -0.633392 |
| H                                 | -3.502397 | 1.088475  | -0.709788 |
| H                                 | -1.925614 | 0.568419  | -1.527623 |
| H                                 | -2.716065 | 0.195318  | 1.406957  |
| O                                 | -0.046851 | -0.613529 | -0.472874 |
| C                                 | 1.298804  | -1.005525 | -0.299905 |
| C                                 | 2.225409  | 0.116990  | 0.072506  |
| C                                 | 1.895601  | 1.400108  | 0.103680  |
| H                                 | 2.618137  | 2.158469  | 0.370294  |
| H                                 | 0.894501  | 1.727901  | -0.142128 |
| H                                 | 3.238261  | -0.190381 | 0.314988  |
| H                                 | 1.617422  | -1.438412 | -1.252058 |
| H                                 | 1.371809  | -1.807907 | 0.447272  |
| H                                 | -0.922421 | -1.526788 | 1.157741  |
| H                                 | -0.204798 | 0.049454  | 1.484476  |

---

**Table S9.** Cartesian coordinates of conformer VIII of DAE obtained at the B3LYP-D3(BJ)/aug-cc pVTZ level.

---

| Cartesian Coordinates (Angstroms) |           |           |           |
|-----------------------------------|-----------|-----------|-----------|
| Atom                              | X         | Y         | Z         |
| C                                 | -0.812635 | 0.134681  | -1.010866 |
| C                                 | -1.936238 | -0.637249 | -0.380905 |
| C                                 | -2.459342 | -0.401332 | 0.813644  |
| H                                 | -3.277060 | -0.995976 | 1.195862  |
| H                                 | -2.088938 | 0.399014  | 1.439551  |
| H                                 | -2.331917 | -1.440902 | -0.995091 |
| O                                 | -0.206267 | 1.084787  | -0.153590 |
| C                                 | 0.780484  | 0.535666  | 0.721533  |
| C                                 | 2.046199  | 0.187452  | -0.000261 |
| C                                 | 2.606567  | -1.014542 | 0.014165  |
| H                                 | 3.530548  | -1.220103 | -0.509229 |
| H                                 | 2.161113  | -1.836182 | 0.562489  |
| H                                 | 2.501766  | 0.995753  | -0.563081 |
| H                                 | 0.389826  | -0.339338 | 1.249095  |
| H                                 | 0.967872  | 1.319133  | 1.457538  |
| H                                 | -1.195012 | 0.697299  | -1.866783 |
| H                                 | -0.064046 | -0.562538 | -1.405834 |

---

**Table S10.** Cartesian coordinates of conformer IX of DAE obtained at the B3LYP-D3(BJ)/aug-cc pVTZ level.

---

| Cartesian Coordinates (Angstroms) |           |           |           |
|-----------------------------------|-----------|-----------|-----------|
| Atom                              | X         | Y         | Z         |
| C                                 | -1.181606 | -0.622797 | 0.085936  |
| C                                 | -2.366734 | 0.155731  | -0.378854 |
| C                                 | -3.400783 | 0.468289  | 0.388832  |
| H                                 | -4.252327 | 1.009779  | 0.000482  |
| H                                 | -3.433200 | 0.189763  | 1.435177  |
| H                                 | -2.347188 | 0.455276  | -1.421041 |
| O                                 | -0.000001 | 0.092767  | -0.241189 |
| C                                 | 1.181605  | -0.622792 | 0.085945  |
| C                                 | 2.366733  | 0.155731  | -0.378852 |
| C                                 | 3.400786  | 0.468287  | 0.388828  |
| H                                 | 4.252331  | 1.009773  | 0.000472  |
| H                                 | 3.433207  | 0.189763  | 1.435173  |
| H                                 | 2.347182  | 0.455274  | -1.421040 |
| H                                 | 1.158450  | -1.604882 | -0.409973 |
| H                                 | 1.237263  | -0.800646 | 1.167233  |
| H                                 | -1.158450 | -1.604880 | -0.409991 |
| H                                 | -1.237265 | -0.800662 | 1.167223  |

---

**Table S11.** Cartesian coordinates of conformer X of DAE obtained at the B3LYP-D3(BJ)/aug-cc pVTZ level.

---

| Cartesian Coordinates (Angstroms) |           |           |           |
|-----------------------------------|-----------|-----------|-----------|
| Atom                              | X         | Y         | Z         |
| C                                 | -0.795993 | -0.445946 | -0.519555 |
| C                                 | -2.117996 | -0.231810 | 0.137801  |
| C                                 | -2.867955 | 0.847030  | -0.036338 |
| H                                 | -3.834290 | 0.949117  | 0.438030  |
| H                                 | -2.542083 | 1.666338  | -0.665684 |
| H                                 | -2.455303 | -1.036521 | 0.782013  |
| O                                 | 0.156759  | -0.798725 | 0.479582  |
| C                                 | 1.461078  | -0.993266 | -0.026816 |
| C                                 | 2.249974  | 0.271566  | -0.215969 |
| C                                 | 1.874027  | 1.475220  | 0.191190  |
| H                                 | 2.500179  | 2.341981  | 0.033156  |
| H                                 | 0.931952  | 1.624811  | 0.701107  |
| H                                 | 3.204652  | 0.141258  | -0.716871 |
| H                                 | 1.423170  | -1.548460 | -0.974599 |
| H                                 | 1.977177  | -1.636968 | 0.690975  |
| H                                 | -0.485224 | 0.453665  | -1.058515 |
| H                                 | -0.864074 | -1.266427 | -1.248451 |

---

**Table S12.** Cartesian coordinates of conformer XI of DAE obtained at the B3LYP-D3(BJ)/aug-cc pVTZ level.

---

| Cartesian Coordinates (Angstroms) |           |           |           |
|-----------------------------------|-----------|-----------|-----------|
| Atom                              | X         | Y         | Z         |
| C                                 | -0.701775 | -0.958524 | -0.017614 |
| C                                 | -2.070034 | -0.514090 | 0.411541  |
| C                                 | -2.663859 | 0.611736  | 0.043025  |
| H                                 | -3.657306 | 0.861367  | 0.387923  |
| H                                 | -2.174666 | 1.311512  | -0.620567 |
| H                                 | -2.583783 | -1.207068 | 1.071358  |
| O                                 | 0.000000  | -0.000003 | -0.789168 |
| C                                 | 0.701773  | 0.958522  | -0.017615 |
| C                                 | 2.070034  | 0.514093  | 0.411539  |
| C                                 | 2.663861  | -0.611733 | 0.043027  |
| H                                 | 3.657310  | -0.861361 | 0.387924  |
| H                                 | 2.174669  | -1.311513 | -0.620563 |
| H                                 | 2.583783  | 1.207074  | 1.071352  |
| H                                 | 0.114863  | 1.249375  | 0.861640  |
| H                                 | 0.789394  | 1.852959  | -0.640726 |
| H                                 | -0.789400 | -1.852961 | -0.640725 |
| H                                 | -0.114865 | -1.249379 | 0.861641  |

---

**Table S13.** Cartesian coordinates of conformer XII of DAE obtained at the B3LYP-D3(BJ)/aug-cc pVTZ level.

---

| Cartesian Coordinates (Angstroms) |           |           |           |
|-----------------------------------|-----------|-----------|-----------|
| Atom                              | X         | Y         | Z         |
| C                                 | -1.339497 | -1.067501 | 0.051339  |
| C                                 | -2.338214 | 0.015119  | -0.245697 |
| C                                 | -2.195774 | 1.295658  | 0.063710  |
| H                                 | -2.964114 | 2.019003  | -0.169912 |
| H                                 | -1.308220 | 1.655109  | 0.566321  |
| H                                 | -3.242440 | -0.324941 | -0.741727 |
| O                                 | -0.098502 | -0.603430 | 0.542677  |
| C                                 | 0.793985  | -0.174889 | -0.482938 |
| C                                 | 1.964949  | 0.500045  | 0.148116  |
| C                                 | 3.228198  | 0.169192  | -0.078222 |
| H                                 | 4.046645  | 0.708189  | 0.378724  |
| H                                 | 3.488414  | -0.652874 | -0.733923 |
| H                                 | 1.725988  | 1.317964  | 0.819266  |
| H                                 | 0.278492  | 0.523030  | -1.153250 |
| H                                 | 1.119425  | -1.035581 | -1.079380 |
| H                                 | -1.189535 | -1.684570 | -0.845340 |
| H                                 | -1.744515 | -1.731214 | 0.820202  |

---

**Appendix 2:** Dihedral angle values for the conformers of DAS and DAE.

**Table S14.** Dihedral angle values (in degrees) for the 24 conformers of DAS obtained at the B3LYP-D3(BJ)/aug-cc-pVTZ level of theory.

| DAS   | $\phi$ | $\delta$ | $\theta$ | $\gamma$ |
|-------|--------|----------|----------|----------|
| I     | -115.5 | 68.7     | 68.7     | -115.5   |
| II    | -9.2   | -71.5    | -63.2    | 111.2    |
| III   | 115.4  | 73.6     | 63.2     | -112.4   |
| IV    | 112.7  | 161.0    | -67.3    | 130.0    |
| V     | -114.3 | 64.9     | 166.8    | 112.7    |
| VI    | 115.8  | 99.5     | -62.7    | 115.9    |
| VII   | -122.8 | 58.7     | -94.6    | 122.5    |
| VIII  | 2.6    | -174.0   | 67.7     | -114.0   |
| IX    | 3.2    | 97.9     | -58.0    | 117.2    |
| X     | 8.9    | 72.9     | -161.9   | -112.1   |
| XI    | -113.2 | -165.2   | -71.8    | -8.9     |
| XII   | -112.4 | -166.9   | 166.9    | 112.4    |
| XIII  | -112.2 | -166.2   | -166.2   | -112.2   |
| XIV   | -114.6 | -71.1    | -162.2   | -112.4   |
| XV    | 9.7    | 72.8     | 72.8     | 9.7      |
| XVI   | 10.1   | 70.9     | 75.8     | 116.2    |
| XVII  | 112.1  | 166.8    | -78.0    | -116.7   |
| XVII  | -111.9 | -63.7    | -63.7    | -111.9   |
| XIX   | 3.1    | 88.6     | -76.0    | -113.2   |
| XX    | 117.5  | 98.3     | -68.9    | -111.7   |
| XXI   | 8.3    | 73.5     | -172.6   | 4.2      |
| XXII  | -0.2   | 179.1    | 167.1    | 112.8    |
| XXIII | -0.7   | 176.2    | 75.1     | 115.8    |
| XXIV  | 0.0    | -180.0   | 180.0    | 0.0      |

**Table S15.** Dihedral angle values (in degrees) for the 23 conformers of DAE obtained at the B3LYP-D3(BJ)/aug-cc-pVTZ level of theory.

| DAE   | $\varphi$ | $\delta$ | $\theta$ | $\gamma$ |
|-------|-----------|----------|----------|----------|
| I     | 124.3     | -69.1    | -69.1    | 124.3    |
| II    | 0.0       | -180.0   | -180.0   | 0.0      |
| III   | 0.6       | 178.8    | 70.5     | -125.9   |
| IV    | 0.4       | 179.8    | -176.1   | -127.7   |
| V     | -128.3    | -174.0   | -70.2    | 125.1    |
| VI    | -127.3    | -177.1   | 70.8     | -125.2   |
| VII   | -2.7      | 169.5    | -82.4    | -7.3     |
| VIII  | -124.6    | 73.5     | 82.7     | 7.2      |
| IX    | -127.9    | -176     | 176.0    | 127.9    |
| X     | 8.1       | 82.3     | -178.5   | 128.9    |
| XI    | 5.4       | 85.2     | 85.2     | 5.4      |
| XII   | -8.5      | -82.5    | 170.6    | 126.3    |
| XIII  | 2.0       | 110.3    | -65.1    | 124.1    |
| XIV   | 125.1     | -70.1    | -81.0    | -121.8   |
| XV    | -0.1      | -174.6   | -77.8    | -120.4   |
| XVI   | -131.1    | 94.1     | -67.0    | 131.8    |
| XVII  | -124.7    | 70.8     | -99.1    | -119.2   |
| XVIII | 119.5     | 75.6     | 169.4    | 127.7    |
| XIX   | -120.2    | -78.8    | 179.8    | 127.3    |
| XX    | 123.9     | 88.2     | 82.9     | 6.0      |
| XXI   | -0.4      | -103.9   | 74.2     | 120.9    |
| XXII  | -123.2    | -85.5    | -85.5    | -123.2   |
| XXIII | -112.9    | -61.5    | -61.5    | -112.9   |



**Appendix 3:** Calculated energetic and spectroscopic parameters for the conformer I of DAS and conformers I–IX of DAE.

**Table S16.** Calculated rotational and quartic centrifugal distortion constants for the observed conformer I of DAS at the B3LYP-D3(BJ)/aug-cc-pVTZ level of theory.

| Parameter           | Conformer I |
|---------------------|-------------|
| A/MHz               | 2449        |
| B/MHz               | 1781        |
| C/MHz               | 1186        |
| $\Delta_J$ /kHz     | 2.3091      |
| $\Delta_{JK}$ /kHz  | -6.4743     |
| $\Delta_K$ /kHz     | 4.4152      |
| $\delta_J$ /kHz     | -0.1330     |
| $\delta_K$ /kHz     | -3.6296     |
| $\mu_a/\mu_b/\mu_c$ | 0.0/1.2/0.0 |

**Table S17.** Calculated rotational and quartic centrifugal distortion constants for the observed nine conformers of DAE at the B3LYP-D3(BJ)/aug-cc-pVTZ level of theory.

| Parameter           | Conformer I | Conformer II | Conformer III | Conformer IV | Conformer V |
|---------------------|-------------|--------------|---------------|--------------|-------------|
| A/MHz               | 3784        | 5842         | 7505          | 8059         | 6276        |
| B/MHz               | 1817        | 1379         | 1208          | 1104         | 1198        |
| C/MHz               | 1396        | 1131         | 1129          | 1010         | 1078        |
| $\Delta_J$ /kHz     | 3.5690      | 0.2520       | 0.4395        | 0.1694       | 0.5049      |
| $\Delta_{JK}$ /kHz  | -16.4878    | -1.4424      | -12.9036      | -4.8265      | -9.7321     |
| $\Delta_K$ /kHz     | 26.5201     | 8.0525       | 162.9582      | 79.1911      | 85.3018     |
| $\delta_J$ /kHz     | 1.2760      | 0.0647       | -0.0037       | 0.0203       | 0.1151      |
| $\delta_K$ /kHz     | 3.0050      | 0.7390       | 4.9686        | -0.8750      | 1.3339      |
| $\mu_a/\mu_b/\mu_c$ | 0.0/1.2/0.0 | 0.0/1.6/0.0  | 1.1/0.9/0.5   | 0.3/1.3/0.0  | 0.6/0.7/0.7 |

  

| Parameter                        | Conformer VI | Conformer VII | Conformer VIII | Conformer IX |
|----------------------------------|--------------|---------------|----------------|--------------|
| A/MHz <sup>a</sup>               | 7493         | 5214          | 5204           | 11535        |
| B/MHz                            | 1125         | 1501          | 1422           | 932          |
| C/MHz                            | 1055         | 1352          | 1380           | 924          |
| $\Delta_J$ /kHz <sup>b</sup>     | 0.2566       | 2.1594        | 1.2606         | 0.1331       |
| $\Delta_{JK}$ /kHz               | -4.6709      | -17.3745      | -14.5056       | -13.8276     |
| $\Delta_K$ /kHz                  | 71.5381      | 68.0071       | 60.7118        | 535.8620     |
| $\delta_J$ /kHz                  | 0.0502       | 0.6488        | 0.1839         | -0.0103      |
| $\delta_K$ /kHz                  | 0.3554       | 6.7428        | -5.0927        | -6.4307      |
| $\mu_a/\mu_b/\mu_c$ <sup>c</sup> | 0.7/0.9/0.4  | 0.7/0.6/1.1   | 0.5/1.1/0.2    | 0.0/1.1/0.4  |

**Appendix 4:** Assigned transitions for the observed species of conformer I of DAS and conformers I–IX of DAE.

**Table S18.** Assigned transitions for the parent species of conformer I of DAS

| J' | K <sub>a</sub> ' | K <sub>c</sub> ' | J'' | K <sub>a</sub> '' | K <sub>c</sub> '' | V <sub>obs</sub> /MHz | V <sub>obs</sub> - calc |
|----|------------------|------------------|-----|-------------------|-------------------|-----------------------|-------------------------|
| 6  | 4                | 3                | 6   | 3                 | 4                 | 7180.7599             | 0.0004                  |
| 6  | 5                | 1                | 6   | 4                 | 2                 | 7487.7198             | -0.0001                 |
| 3  | 1                | 2                | 2   | 2                 | 1                 | 7580.3748             | 0.0006                  |
| 3  | 1                | 2                | 2   | 2                 | 1                 | 7580.3751             | 0.0009                  |
| 3  | 0                | 3                | 2   | 1                 | 2                 | 7732.4123             | -0.0005                 |
| 5  | 2                | 4                | 5   | 1                 | 5                 | 7774.4837             | -0.0038                 |
| 6  | 3                | 4                | 6   | 2                 | 5                 | 7787.5076             | 0.0001                  |
| 5  | 5                | 0                | 5   | 4                 | 1                 | 8006.9357             | -0.0004                 |
| 8  | 3                | 5                | 8   | 2                 | 6                 | 8023.9536             | 0.0009                  |
| 7  | 4                | 4                | 7   | 3                 | 5                 | 8062.1770             | 0.0009                  |
| 6  | 5                | 2                | 6   | 4                 | 3                 | 8136.4923             | 0.0005                  |
| 5  | 5                | 1                | 5   | 4                 | 2                 | 8169.0923             | 0.0002                  |
| 3  | 1                | 3                | 2   | 0                 | 2                 | 8173.6139             | -0.0003                 |
| 7  | 5                | 3                | 7   | 4                 | 4                 | 8280.9563             | 0.0001                  |
| 2  | 2                | 1                | 1   | 1                 | 0                 | 8524.2260             | -0.0008                 |
| 8  | 5                | 4                | 8   | 4                 | 5                 | 8729.5906             | 0.0001                  |
| 7  | 2                | 5                | 7   | 1                 | 6                 | 8904.0984             | -0.0003                 |
| 8  | 6                | 2                | 8   | 5                 | 3                 | 8935.8383             | 0.0020                  |
| 7  | 3                | 5                | 7   | 2                 | 6                 | 9318.8845             | 0.0003                  |
| 6  | 1                | 5                | 6   | 0                 | 6                 | 9375.2302             | -0.0009                 |
| 2  | 2                | 0                | 1   | 1                 | 1                 | 9390.5713             | -0.0017                 |
| 6  | 2                | 5                | 6   | 1                 | 6                 | 9460.1206             | -0.0018                 |
| 9  | 5                | 5                | 9   | 4                 | 6                 | 9555.8810             | 0.0004                  |
| 7  | 6                | 1                | 7   | 5                 | 2                 | 9587.5855             | 0.0002                  |

|    |   |   |    |   |   |            |         |
|----|---|---|----|---|---|------------|---------|
| 8  | 6 | 3 | 8  | 5 | 4 | 9738.7936  | 0.0001  |
| 7  | 6 | 2 | 7  | 5 | 3 | 9825.4581  | 0.0004  |
| 9  | 6 | 4 | 9  | 5 | 5 | 9827.9912  | -0.0002 |
| 6  | 6 | 0 | 6  | 5 | 1 | 9919.1566  | 0.0015  |
| 6  | 6 | 1 | 6  | 5 | 2 | 9965.2995  | 0.0000  |
| 4  | 0 | 4 | 3  | 1 | 3 | 10250.0357 | -0.0007 |
| 4  | 1 | 4 | 3  | 0 | 3 | 10398.7378 | -0.0005 |
| 10 | 5 | 6 | 10 | 4 | 7 | 10750.6028 | 0.0001  |
| 9  | 4 | 6 | 9  | 3 | 7 | 10801.3136 | 0.0013  |
| 8  | 2 | 6 | 8  | 1 | 7 | 10840.7954 | 0.0010  |
| 3  | 2 | 2 | 2  | 1 | 1 | 10885.7754 | 0.0000  |
| 4  | 1 | 3 | 3  | 2 | 2 | 10970.3425 | 0.0000  |
| 8  | 3 | 6 | 8  | 2 | 7 | 10990.7879 | 0.0000  |
| 7  | 1 | 6 | 7  | 0 | 7 | 11167.9325 | -0.0001 |
| 6  | 3 | 4 | 5  | 4 | 1 | 11174.9884 | -0.0007 |
| 7  | 2 | 6 | 7  | 1 | 7 | 11192.9150 | -0.0002 |
| 10 | 7 | 4 | 10 | 6 | 5 | 11291.4692 | -0.0015 |
| 9  | 7 | 3 | 9  | 6 | 4 | 11430.2396 | -0.0012 |
| 8  | 7 | 1 | 8  | 6 | 2 | 11549.7472 | -0.0006 |
| 8  | 7 | 2 | 8  | 6 | 3 | 11622.8550 | -0.0003 |
| 10 | 3 | 7 | 10 | 2 | 8 | 12239.5408 | -0.0036 |
| 10 | 4 | 7 | 10 | 3 | 8 | 12466.6631 | 0.0002  |
| 5  | 0 | 5 | 4  | 1 | 4 | 12663.1419 | -0.0005 |
| 9  | 2 | 7 | 9  | 1 | 8 | 12677.3052 | 0.0012  |
| 5  | 1 | 5 | 4  | 0 | 4 | 12705.3031 | -0.0005 |
| 9  | 3 | 7 | 9  | 2 | 8 | 12725.3785 | 0.0008  |
| 8  | 1 | 7 | 8  | 0 | 8 | 12934.0691 | 0.0005  |
| 8  | 2 | 7 | 8  | 1 | 8 | 12940.8770 | 0.0001  |
| 4  | 2 | 3 | 3  | 1 | 2 | 12952.4847 | 0.0006  |
| 10 | 8 | 2 | 10 | 7 | 3 | 13138.0291 | 0.0030  |
| 5  | 2 | 3 | 4  | 3 | 2 | 13235.1006 | 0.0017  |

|    |   |   |    |   |   |            |         |
|----|---|---|----|---|---|------------|---------|
| 10 | 8 | 3 | 10 | 7 | 4 | 13237.5660 | -0.0028 |
| 7  | 4 | 4 | 6  | 5 | 1 | 13366.4441 | 0.0000  |
| 3  | 3 | 1 | 2  | 2 | 0 | 13597.8489 | 0.0006  |
| 5  | 1 | 4 | 4  | 2 | 3 | 13978.6016 | 0.0000  |
| 10 | 2 | 8 | 10 | 1 | 9 | 14466.8814 | 0.0002  |
| 10 | 3 | 8 | 10 | 2 | 9 | 14481.0933 | 0.0004  |
| 6  | 3 | 3 | 5  | 4 | 2 | 14571.5099 | 0.0004  |
| 9  | 1 | 8 | 9  | 0 | 9 | 14690.4665 | 0.0011  |
| 9  | 2 | 8 | 9  | 1 | 9 | 14692.2215 | -0.0016 |
| 5  | 2 | 4 | 4  | 1 | 3 | 14913.9293 | -0.0001 |
| 6  | 0 | 6 | 5  | 1 | 5 | 15039.0650 | -0.0001 |
| 6  | 1 | 6 | 5  | 0 | 5 | 15049.8980 | -0.0002 |
| 4  | 3 | 2 | 3  | 2 | 1 | 16095.7896 | 0.0001  |
| 10 | 1 | 9 | 10 | 0 | 0 | 16443.0824 | 0.0002  |
| 10 | 2 | 9 | 10 | 1 | 0 | 16443.5183 | 0.0002  |
| 6  | 1 | 5 | 5  | 2 | 4 | 16639.8090 | 0.0001  |
| 6  | 2 | 4 | 5  | 3 | 3 | 16974.2978 | 0.0003  |
| 6  | 2 | 5 | 5  | 1 | 4 | 16991.7400 | -0.0001 |
| 7  | 0 | 7 | 6  | 1 | 6 | 17403.9734 | 0.0000  |
| 7  | 1 | 7 | 6  | 0 | 6 | 17406.5913 | 0.0000  |
| 9  | 4 | 6 | 8  | 5 | 3 | 17508.6877 | -0.0009 |
| 4  | 3 | 1 | 3  | 2 | 2 | 17685.2828 | 0.0000  |
| 3  | 3 | 1 | 2  | 0 | 2 | 17988.7663 | -0.0004 |
| 4  | 4 | 1 | 3  | 3 | 0 | 18609.9738 | 0.0004  |
| 4  | 4 | 0 | 3  | 3 | 1 | 18711.3040 | 0.0005  |
| 7  | 3 | 4 | 6  | 4 | 3 | 18936.0021 | -0.0002 |
| 7  | 1 | 6 | 6  | 2 | 5 | 19111.7837 | 0.0000  |
| 7  | 2 | 6 | 6  | 1 | 5 | 19224.2754 | 0.0001  |
| 8  | 0 | 8 | 7  | 1 | 7 | 19765.9991 | 0.0007  |
| 8  | 1 | 8 | 7  | 0 | 7 | 19766.6058 | 0.0006  |
| 6  | 3 | 4 | 5  | 2 | 3 | 19970.2301 | -0.0007 |

7 2 5 6 3 4 20228.3754 0.0004

---

**Table S19.** Assigned transitions for the  $^{13}\text{C}1$  isotopic species of conformer I of DAS

| J' | K <sub>a</sub> ' | K <sub>c</sub> ' | J'' | K <sub>a</sub> '' | K <sub>c</sub> '' | V <sub>obs</sub> /MHz | V <sub>obs</sub> - calc |
|----|------------------|------------------|-----|-------------------|-------------------|-----------------------|-------------------------|
| 6  | 4                | 3                | 6   | 3                 | 4                 | 7150.7321             | -0.0014                 |
| 3  | 0                | 3                | 2   | 1                 | 2                 | 7697.7302             | -0.0004                 |
| 6  | 3                | 4                | 6   | 2                 | 5                 | 7722.2295             | 0.0019                  |
| 3  | 1                | 3                | 2   | 0                 | 2                 | 8146.3871             | -0.0004                 |
| 7  | 5                | 3                | 7   | 4                 | 4                 | 8265.8509             | 0.0002                  |
| 2  | 2                | 1                | 1   | 1                 | 0                 | 8492.1918             | -0.0019                 |
| 2  | 2                | 0                | 1   | 1                 | 1                 | 9343.9021             | 0.0030                  |
| 6  | 2                | 5                | 6   | 1                 | 6                 | 9371.4927             | -0.0022                 |
| 4  | 0                | 4                | 3   | 1                 | 3                 | 10209.8881            | -0.0007                 |
| 4  | 1                | 4                | 3   | 0                 | 3                 | 10362.9166            | -0.0002                 |
| 3  | 2                | 2                | 2   | 1                 | 1                 | 10846.2263            | -0.0001                 |
| 4  | 1                | 3                | 3   | 2                 | 2                 | 10898.1361            | 0.0011                  |
| 5  | 0                | 5                | 4   | 1                 | 4                 | 12616.7969            | -0.0004                 |
| 5  | 1                | 5                | 4   | 0                 | 4                 | 12660.7182            | -0.0010                 |
| 4  | 2                | 3                | 3   | 1                 | 2                 | 12908.7294            | 0.0014                  |
| 5  | 2                | 3                | 4   | 3                 | 2                 | 13118.8710            | -0.0010                 |
| 3  | 3                | 1                | 2   | 2                 | 0                 | 13545.9798            | -0.0007                 |
| 3  | 3                | 0                | 2   | 2                 | 1                 | 13881.4144            | 0.0005                  |
| 5  | 1                | 4                | 4   | 2                 | 3                 | 13904.1393            | 0.0001                  |
| 5  | 2                | 4                | 4   | 1                 | 3                 | 14863.4460            | -0.0013                 |
| 6  | 0                | 6                | 5   | 1                 | 5                 | 14985.7727            | -0.0003                 |
| 6  | 1                | 6                | 5   | 0                 | 5                 | 14997.1974            | 0.0008                  |
| 4  | 3                | 2                | 3   | 2                 | 1                 | 16037.4853            | 0.0006                  |
| 6  | 1                | 5                | 5   | 2                 | 4                 | 16564.3330            | 0.0011                  |
| 6  | 2                | 5                | 5   | 1                 | 4                 | 16929.9448            | 0.0005                  |
| 7  | 0                | 7                | 6   | 1                 | 6                 | 17343.3629            | -0.0007                 |

|   |   |   |   |   |   |            |         |
|---|---|---|---|---|---|------------|---------|
| 7 | 1 | 7 | 6 | 0 | 6 | 17346.1577 | -0.0001 |
| 4 | 3 | 1 | 3 | 2 | 2 | 17587.0650 | 0.0007  |
| 5 | 3 | 3 | 4 | 2 | 2 | 18117.6398 | -0.0011 |
| 4 | 4 | 1 | 3 | 3 | 0 | 18536.9384 | 0.0007  |
| 4 | 4 | 0 | 3 | 3 | 1 | 18634.2678 | -0.0009 |
| 7 | 1 | 6 | 6 | 2 | 5 | 19032.7479 | 0.0001  |
| 7 | 2 | 6 | 6 | 1 | 5 | 19151.1214 | 0.0019  |
| 8 | 0 | 8 | 7 | 1 | 7 | 19697.9332 | -0.0005 |
| 8 | 1 | 8 | 7 | 0 | 7 | 19698.5888 | -0.0003 |

**Table S20.** Assigned transitions for the  $^{13}\text{C}_2$  isotopic species of conformer I of DAS

| J' | K <sub>a</sub> ' | K <sub>c</sub> ' | J'' | K <sub>a</sub> '' | K <sub>c</sub> '' | V <sub>obs</sub> /MHz | V <sub>obs</sub> - calc |
|----|------------------|------------------|-----|-------------------|-------------------|-----------------------|-------------------------|
| 6  | 4                | 3                | 6   | 3                 | 4                 | 7240.3477             | -0.0009                 |
| 3  | 0                | 3                | 2   | 1                 | 2                 | 7641.5826             | -0.0002                 |
| 6  | 3                | 4                | 6   | 2                 | 5                 | 7747.7068             | 0.0013                  |
| 3  | 1                | 3                | 2   | 0                 | 2                 | 8116.3106             | -0.0004                 |
| 6  | 5                | 2                | 6   | 4                 | 3                 | 8296.1335             | -0.0005                 |
| 7  | 5                | 3                | 7   | 4                 | 4                 | 8411.4287             | -0.0001                 |
| 2  | 2                | 1                | 1   | 1                 | 0                 | 8507.7219             | -0.0006                 |
| 2  | 2                | 0                | 1   | 1                 | 1                 | 9346.4026             | -0.0008                 |
| 6  | 2                | 5                | 6   | 1                 | 6                 | 9381.0340             | -0.0010                 |
| 7  | 6                | 1                | 7   | 5                 | 2                 | 9835.7505             | 0.0003                  |
| 7  | 6                | 2                | 7   | 5                 | 3                 | 10038.4191            | -0.0001                 |
| 4  | 0                | 4                | 3   | 1                 | 3                 | 10147.1380            | -0.0001                 |
| 4  | 1                | 4                | 3   | 0                 | 3                 | 10313.1982            | 0.0000                  |
| 3  | 2                | 2                | 2   | 1                 | 1                 | 10847.3208            | 0.0017                  |
| 5  | 0                | 5                | 4   | 1                 | 4                 | 12543.6807            | -0.0003                 |
| 5  | 1                | 5                | 4   | 0                 | 4                 | 12592.5966            | -0.0006                 |
| 4  | 2                | 3                | 3   | 1                 | 2                 | 12896.3680            | 0.0015                  |

|   |   |   |   |   |   |            |         |
|---|---|---|---|---|---|------------|---------|
| 3 | 3 | 1 | 2 | 2 | 0 | 13578.2367 | -0.0010 |
| 5 | 1 | 4 | 4 | 2 | 3 | 13796.8786 | 0.0011  |
| 3 | 3 | 0 | 2 | 2 | 1 | 13901.1169 | 0.0000  |
| 5 | 2 | 4 | 4 | 1 | 3 | 14830.2335 | -0.0028 |
| 6 | 0 | 6 | 5 | 1 | 5 | 14899.8331 | -0.0007 |
| 6 | 1 | 6 | 5 | 0 | 5 | 14912.8891 | -0.0001 |
| 4 | 3 | 2 | 3 | 2 | 1 | 16060.5139 | 0.0007  |
| 6 | 1 | 5 | 5 | 2 | 4 | 16463.4572 | 0.0009  |
| 6 | 2 | 4 | 5 | 3 | 3 | 16651.4492 | -0.0007 |
| 6 | 2 | 5 | 5 | 1 | 4 | 16868.1453 | 0.0010  |
| 7 | 0 | 7 | 6 | 1 | 6 | 17243.5221 | 0.0004  |
| 7 | 1 | 7 | 6 | 0 | 6 | 17246.7980 | -0.0003 |
| 4 | 3 | 1 | 3 | 2 | 2 | 17558.8233 | 0.0004  |
| 5 | 3 | 3 | 4 | 2 | 2 | 18133.2218 | 0.0000  |
| 4 | 4 | 1 | 3 | 3 | 0 | 18581.8073 | 0.0004  |
| 4 | 4 | 0 | 3 | 3 | 1 | 18672.9772 | 0.0004  |
| 7 | 1 | 6 | 6 | 2 | 5 | 18928.8269 | -0.0001 |
| 7 | 2 | 6 | 6 | 1 | 5 | 19063.4723 | 0.0003  |
| 8 | 0 | 8 | 7 | 1 | 7 | 19583.8063 | -0.0004 |
| 8 | 1 | 8 | 7 | 0 | 7 | 19584.5959 | 0.0005  |

**Table S21.** Assigned transitions for the  $^{13}\text{C}_3$  isotopic species of conformer I of DAS

| J' | K <sub>a</sub> ' | K <sub>c</sub> ' | J'' | K <sub>a</sub> '' | K <sub>c</sub> '' | $\nu_{\text{obs}}/\text{MHz}$ | $\nu_{\text{obs}} - \nu_{\text{calc}}$ |
|----|------------------|------------------|-----|-------------------|-------------------|-------------------------------|----------------------------------------|
| 6  | 4                | 3                | 6   | 3                 | 4                 | 7093.2021                     | 0.0006                                 |
| 3  | 0                | 3                | 2   | 1                 | 2                 | 7617.2028                     | 0.0002                                 |
| 3  | 1                | 3                | 2   | 0                 | 2                 | 8051.5592                     | 0.0004                                 |
| 7  | 5                | 3                | 7   | 4                 | 4                 | 8176.8862                     | 0.0000                                 |
| 2  | 2                | 1                | 1   | 1                 | 0                 | 8405.5084                     | -0.0003                                |
| 8  | 5                | 4                | 8   | 4                 | 5                 | 8622.9062                     | -0.0003                                |



---

|   |   |   |   |   |   |            |         |
|---|---|---|---|---|---|------------|---------|
| 6 | 2 | 5 | 6 | 1 | 6 | 9352.5035  | 0.0004  |
| 7 | 6 | 2 | 7 | 5 | 3 | 9698.9507  | -0.0003 |
| 4 | 0 | 4 | 3 | 1 | 3 | 10096.2305 | 0.0000  |
| 4 | 1 | 4 | 3 | 0 | 3 | 10242.3455 | 0.0002  |
| 3 | 2 | 2 | 2 | 1 | 1 | 10730.7895 | -0.0017 |
| 4 | 1 | 3 | 3 | 2 | 2 | 10812.3388 | 0.0000  |
| 7 | 1 | 6 | 7 | 0 | 7 | 11041.2572 | -0.0004 |
| 7 | 2 | 6 | 7 | 1 | 7 | 11065.6791 | -0.0007 |
| 5 | 0 | 5 | 4 | 1 | 4 | 12472.2024 | -0.0001 |
| 5 | 1 | 5 | 4 | 0 | 4 | 12513.5489 | 0.0000  |
| 4 | 2 | 3 | 3 | 1 | 2 | 12764.5017 | -0.0028 |
| 5 | 2 | 3 | 4 | 3 | 2 | 13047.8662 | -0.0005 |
| 3 | 3 | 1 | 2 | 2 | 0 | 13409.9392 | 0.0003  |
| 3 | 3 | 0 | 2 | 2 | 1 | 13751.8208 | 0.0008  |
| 5 | 1 | 4 | 4 | 2 | 3 | 13775.1725 | -0.0001 |
| 5 | 2 | 4 | 4 | 1 | 3 | 14694.7176 | 0.0008  |
| 6 | 0 | 6 | 5 | 1 | 5 | 14811.5878 | -0.0001 |
| 6 | 1 | 6 | 5 | 0 | 5 | 14822.1916 | 0.0008  |
| 4 | 3 | 2 | 3 | 2 | 1 | 15869.6855 | -0.0005 |
| 6 | 1 | 5 | 5 | 2 | 4 | 16395.2388 | -0.0001 |
| 6 | 2 | 4 | 5 | 3 | 3 | 16732.9905 | 0.0001  |
| 6 | 2 | 5 | 5 | 1 | 4 | 16740.5194 | 0.0005  |
| 7 | 0 | 7 | 6 | 1 | 6 | 17140.1581 | -0.0004 |
| 7 | 1 | 7 | 6 | 0 | 6 | 17142.7150 | -0.0008 |
| 4 | 3 | 1 | 3 | 2 | 2 | 17445.1058 | 0.0007  |
| 5 | 3 | 3 | 4 | 2 | 2 | 17917.8245 | -0.0002 |
| 4 | 4 | 1 | 3 | 3 | 0 | 18353.8803 | 0.0002  |
| 4 | 4 | 0 | 3 | 3 | 1 | 18454.5516 | 0.0008  |
| 7 | 1 | 6 | 6 | 2 | 5 | 18828.9138 | 0.0006  |
| 7 | 2 | 6 | 6 | 1 | 5 | 18939.0531 | 0.0016  |
| 8 | 0 | 8 | 7 | 1 | 7 | 19465.9038 | -0.0009 |

---

**Table S22.** Assigned transitions for the  $^{34}\text{S}$  Isotopic species of conformer I of DAS

| J' | K <sub>a</sub> ' | K <sub>c</sub> ' | J'' | K <sub>a</sub> '' | K <sub>c</sub> '' | V <sub>obs</sub> /MHz | V <sub>obs</sub> - calc |
|----|------------------|------------------|-----|-------------------|-------------------|-----------------------|-------------------------|
| 6  | 4                | 3                | 6   | 3                 | 4                 | 6944.3377             | -0.0010                 |
| 3  | 0                | 3                | 2   | 1                 | 2                 | 7687.2445             | 0.0006                  |
| 6  | 5                | 2                | 6   | 4                 | 3                 | 7693.1414             | 0.0001                  |
| 6  | 3                | 4                | 6   | 2                 | 5                 | 7714.7828             | -0.0017                 |
| 5  | 2                | 4                | 5   | 1                 | 5                 | 7728.9854             | -0.0012                 |
| 7  | 4                | 4                | 7   | 3                 | 5                 | 7908.7695             | 0.0004                  |
| 3  | 1                | 3                | 2   | 0                 | 2                 | 8062.6173             | -0.0006                 |
| 2  | 2                | 1                | 1   | 1                 | 0                 | 8351.5247             | -0.0012                 |
| 2  | 2                | 0                | 1   | 1                 | 1                 | 9253.1370             | 0.0010                  |
| 4  | 0                | 4                | 3   | 1                 | 3                 | 10159.2329            | -0.0004                 |
| 4  | 1                | 4                | 3   | 0                 | 3                 | 10276.9775            | -0.0006                 |
| 4  | 1                | 3                | 3   | 2                 | 2                 | 11017.6451            | 0.0002                  |
| 5  | 0                | 5                | 4   | 1                 | 4                 | 12537.2583            | -0.0004                 |
| 5  | 1                | 5                | 4   | 0                 | 4                 | 12568.2771            | -0.0005                 |
| 4  | 2                | 3                | 3   | 1                 | 2                 | 12728.2315            | 0.0000                  |
| 3  | 3                | 1                | 2   | 2                 | 0                 | 13313.1352            | -0.0003                 |
| 5  | 2                | 3                | 4   | 3                 | 2                 | 13472.3673            | -0.0006                 |
| 3  | 3                | 0                | 2   | 2                 | 1                 | 13694.5405            | 0.0000                  |
| 5  | 1                | 4                | 4   | 2                 | 3                 | 13931.1191            | -0.0001                 |
| 5  | 2                | 4                | 4   | 1                 | 3                 | 14685.6890            | -0.0002                 |
| 6  | 0                | 6                | 5   | 1                 | 5                 | 14884.3472            | -0.0008                 |
| 6  | 1                | 6                | 5   | 0                 | 5                 | 14891.7560            | -0.0001                 |
| 4  | 3                | 2                | 3   | 2                 | 1                 | 15771.5338            | 0.0008                  |
| 6  | 1                | 5                | 5   | 2                 | 4                 | 16514.4390            | -0.0002                 |
| 6  | 2                | 5                | 5   | 1                 | 4                 | 16777.2748            | 0.0002                  |
| 6  | 2                | 4                | 5   | 3                 | 3                 | 17094.8694            | 0.0010                  |
| 7  | 0                | 7                | 6   | 1                 | 6                 | 17222.9705            | -0.0002                 |

|   |   |   |   |   |   |            |         |
|---|---|---|---|---|---|------------|---------|
| 7 | 1 | 7 | 6 | 0 | 6 | 17224.6347 | -0.0004 |
| 4 | 3 | 1 | 3 | 2 | 2 | 17506.3914 | 0.0030  |
| 5 | 3 | 3 | 4 | 2 | 2 | 17810.9086 | -0.0008 |
| 4 | 4 | 1 | 3 | 3 | 0 | 18225.0297 | 0.0000  |
| 4 | 4 | 0 | 3 | 3 | 1 | 18345.6921 | -0.0004 |
| 7 | 1 | 6 | 6 | 2 | 5 | 18934.6120 | -0.0002 |
| 7 | 2 | 6 | 6 | 1 | 5 | 19012.4231 | -0.0007 |
| 8 | 0 | 8 | 7 | 1 | 7 | 19559.5518 | 0.0003  |
| 8 | 1 | 8 | 7 | 0 | 7 | 19559.9104 | 0.0003  |
| 6 | 3 | 4 | 5 | 2 | 3 | 19578.8642 | 0.0019  |

**Table S23.** Assigned transitions for the parent species of conformer I of DAE

| J' | K <sub>a</sub> ' | K <sub>c</sub> ' | J'' | K <sub>a</sub> '' | K <sub>c</sub> '' | V <sub>obs</sub> /MHz | V <sub>obs</sub> - calc |
|----|------------------|------------------|-----|-------------------|-------------------|-----------------------|-------------------------|
| 2  | 2                | 1                | 2   | 1                 | 2                 | 7170.7661             | -0.0012                 |
| 3  | 0                | 3                | 2   | 1                 | 2                 | 7780.8672             | -0.0005                 |
| 3  | 2                | 2                | 3   | 1                 | 3                 | 7839.6831             | -0.0021                 |
| 2  | 1                | 2                | 1   | 0                 | 1                 | 7962.1138             | -0.0004                 |
| 8  | 3                | 5                | 8   | 2                 | 6                 | 8202.4262             | 0.0029                  |
| 9  | 3                | 6                | 9   | 2                 | 7                 | 8320.2886             | 0.0032                  |
| 8  | 2                | 6                | 8   | 1                 | 7                 | 8504.9001             | -0.0004                 |
| 7  | 3                | 4                | 7   | 2                 | 5                 | 8510.7975             | 0.0000                  |
| 6  | 1                | 5                | 6   | 0                 | 6                 | 8681.6909             | 0.0018                  |
| 4  | 2                | 3                | 4   | 1                 | 4                 | 8743.1272             | -0.0034                 |
| 6  | 3                | 3                | 6   | 2                 | 4                 | 9085.1816             | 0.0004                  |
| 5  | 3                | 2                | 5   | 2                 | 3                 | 9733.5625             | -0.0013                 |
| 5  | 2                | 4                | 5   | 1                 | 5                 | 9878.1483             | -0.0017                 |
| 4  | 3                | 1                | 4   | 2                 | 2                 | 10283.8320            | -0.0004                 |
| 3  | 1                | 3                | 2   | 0                 | 2                 | 10562.1785            | 0.0000                  |
| 3  | 3                | 0                | 3   | 2                 | 1                 | 10640.3874            | -0.0005                 |

---

|   |   |   |   |   |   |            |         |
|---|---|---|---|---|---|------------|---------|
| 3 | 3 | 1 | 3 | 2 | 2 | 10931.1756 | -0.0001 |
| 4 | 3 | 2 | 4 | 2 | 3 | 11086.2120 | 0.0007  |
| 4 | 0 | 4 | 3 | 1 | 3 | 11111.9207 | 0.0002  |
| 6 | 2 | 5 | 6 | 1 | 6 | 11230.1885 | -0.0001 |
| 5 | 3 | 3 | 5 | 2 | 4 | 11379.2913 | 0.0010  |
| 6 | 3 | 4 | 6 | 2 | 5 | 11852.5169 | 0.0019  |
| 5 | 1 | 4 | 4 | 2 | 3 | 12204.4488 | 0.0007  |
| 7 | 3 | 5 | 7 | 2 | 6 | 12538.1393 | 0.0031  |
| 2 | 2 | 1 | 1 | 1 | 0 | 12742.5681 | -0.0003 |
| 7 | 2 | 6 | 7 | 1 | 7 | 12772.7830 | 0.0014  |
| 4 | 1 | 4 | 3 | 0 | 3 | 13054.6373 | -0.0006 |
| 2 | 2 | 0 | 1 | 1 | 1 | 13225.4982 | -0.0015 |
| 5 | 0 | 5 | 4 | 1 | 4 | 14311.2948 | 0.0008  |
| 7 | 4 | 3 | 7 | 3 | 4 | 14261.2697 | 0.0001  |
| 6 | 4 | 2 | 6 | 3 | 3 | 14725.5089 | 0.0002  |
| 5 | 4 | 1 | 5 | 3 | 2 | 14990.0866 | 0.0006  |
| 4 | 4 | 0 | 4 | 3 | 1 | 15119.4376 | 0.0003  |
| 5 | 4 | 2 | 5 | 3 | 3 | 15136.1964 | 0.0028  |
| 6 | 4 | 3 | 6 | 3 | 4 | 15137.1323 | 0.0005  |
| 4 | 4 | 1 | 4 | 3 | 2 | 15157.4203 | 0.0000  |
| 7 | 2 | 5 | 6 | 3 | 4 | 15170.3909 | -0.0021 |
| 7 | 4 | 4 | 7 | 3 | 5 | 15195.3849 | -0.0033 |
| 8 | 4 | 5 | 8 | 3 | 6 | 15355.3896 | -0.0015 |
| 3 | 2 | 2 | 2 | 1 | 1 | 15528.5792 | -0.0015 |
| 5 | 1 | 5 | 4 | 0 | 4 | 15537.3831 | -0.0003 |
| 9 | 4 | 6 | 9 | 3 | 7 | 15664.1560 | -0.0036 |
| 6 | 1 | 5 | 5 | 2 | 4 | 16174.1043 | 0.0009  |
| 6 | 0 | 6 | 5 | 1 | 5 | 17370.5656 | 0.0012  |
| 6 | 1 | 6 | 5 | 0 | 5 | 18081.3980 | 0.0006  |
| 4 | 2 | 3 | 3 | 1 | 2 | 18097.1392 | 0.0012  |

---

**Table S24.** Assigned transitions for the  $^{13}\text{C}1$  isotopic species of conformer I of DAE

| J' | K <sub>a</sub> ' | K <sub>c</sub> ' | J'' | K <sub>a</sub> '' | K <sub>c</sub> '' | V <sub>obs</sub> /MHz | V <sub>obs</sub> - calc |
|----|------------------|------------------|-----|-------------------|-------------------|-----------------------|-------------------------|
| 3  | 0                | 3                | 2   | 1                 | 2                 | 7755.6882             | -0.0001                 |
| 3  | 2                | 2                | 3   | 1                 | 3                 | 7768.1859             | -0.0034                 |
| 2  | 1                | 2                | 1   | 0                 | 1                 | 7920.6355             | 0.0026                  |
| 3  | 1                | 3                | 2   | 0                 | 2                 | 10512.5656            | -0.0015                 |
| 4  | 3                | 2                | 4   | 2                 | 3                 | 10985.9294            | 0.0017                  |
| 4  | 0                | 4                | 3   | 1                 | 3                 | 11071.8445            | -0.0038                 |
| 5  | 3                | 3                | 5   | 2                 | 4                 | 11276.0705            | -0.0018                 |
| 2  | 2                | 1                | 1   | 1                 | 0                 | 12657.6988            | -0.0020                 |
| 4  | 1                | 4                | 3   | 0                 | 3                 | 12997.8724            | -0.0021                 |
| 2  | 2                | 0                | 1   | 1                 | 1                 | 13135.9814            | -0.0007                 |
| 5  | 0                | 5                | 4   | 1                 | 4                 | 14257.6466            | 0.0015                  |
| 5  | 1                | 5                | 4   | 0                 | 4                 | 15473.4886            | 0.0003                  |
| 3  | 2                | 1                | 2   | 1                 | 2                 | 16981.1913            | 0.0029                  |
| 6  | 0                | 6                | 5   | 1                 | 5                 | 17304.6686            | 0.0016                  |
| 4  | 2                | 3                | 3   | 1                 | 2                 | 17994.5670            | 0.0036                  |
| 6  | 1                | 6                | 5   | 0                 | 5                 | 18009.7398            | -0.0021                 |

**Table S25.** Assigned transitions for the  $^{13}\text{C}2$  isotopic species of conformer I of DAE.

| J' | K <sub>a</sub> ' | K <sub>c</sub> ' | J'' | K <sub>a</sub> '' | K <sub>c</sub> '' | V <sub>obs</sub> /MHz | V <sub>obs</sub> - calc |
|----|------------------|------------------|-----|-------------------|-------------------|-----------------------|-------------------------|
| 3  | 2                | 2                | 3   | 1                 | 3                 | 7861.4599             | -0.0032                 |
| 4  | 3                | 1                | 4   | 2                 | 2                 | 10399.0437            | -0.0019                 |
| 3  | 1                | 3                | 2   | 0                 | 2                 | 10496.4700            | 0.0003                  |
| 4  | 0                | 4                | 3   | 1                 | 3                 | 10956.8065            | -0.0037                 |
| 4  | 3                | 2                | 4   | 2                 | 3                 | 11164.0705            | 0.0006                  |
| 5  | 3                | 3                | 5   | 2                 | 4                 | 11443.1931            | 0.0011                  |
| 2  | 2                | 1                | 1   | 1                 | 0                 | 12726.0336            | 0.0022                  |

|   |   |   |   |   |   |            |         |
|---|---|---|---|---|---|------------|---------|
| 4 | 1 | 4 | 3 | 0 | 3 | 12964.5917 | -0.0016 |
| 2 | 2 | 0 | 1 | 1 | 1 | 13196.1702 | -0.0021 |
| 5 | 0 | 5 | 4 | 1 | 4 | 14134.7852 | 0.0014  |
| 5 | 1 | 5 | 4 | 0 | 4 | 15418.9943 | -0.0001 |
| 3 | 2 | 2 | 2 | 1 | 1 | 15484.7783 | 0.0040  |
| 6 | 0 | 6 | 5 | 1 | 5 | 17175.1867 | 0.0022  |
| 6 | 1 | 6 | 5 | 0 | 5 | 17930.6467 | -0.0019 |

**Table S26.** Assigned transitions for the  $^{13}\text{C}3$  isotopic species of conformer I of DAE.

| J' | K <sub>a</sub> ' | K <sub>c</sub> ' | J'' | K <sub>a</sub> '' | K <sub>c</sub> '' | V <sub>obs</sub> /MHz | V <sub>obs</sub> - calc |
|----|------------------|------------------|-----|-------------------|-------------------|-----------------------|-------------------------|
| 3  | 2                | 2                | 3   | 1                 | 3                 | 7747.3297             | 0.0013                  |
| 2  | 1                | 2                | 1   | 0                 | 1                 | 7838.6276             | 0.0010                  |
| 3  | 1                | 3                | 2   | 0                 | 2                 | 10393.2059            | -0.0001                 |
| 4  | 0                | 4                | 3   | 1                 | 3                 | 10922.3095            | -0.0008                 |
| 4  | 3                | 2                | 4   | 2                 | 3                 | 10955.0753            | 0.0019                  |
| 5  | 3                | 3                | 5   | 2                 | 4                 | 11244.8696            | -0.0019                 |
| 2  | 2                | 1                | 1   | 1                 | 0                 | 12562.6223            | -0.0024                 |
| 4  | 1                | 4                | 3   | 0                 | 3                 | 12841.4555            | 0.0031                  |
| 2  | 2                | 0                | 1   | 1                 | 1                 | 13040.0303            | -0.0023                 |
| 5  | 0                | 5                | 4   | 1                 | 4                 | 14069.1267            | 0.0000                  |
| 5  | 1                | 5                | 4   | 0                 | 4                 | 15280.1440            | -0.0031                 |
| 3  | 2                | 1                | 2   | 1                 | 2                 | 16845.6255            | 0.0007                  |
| 6  | 0                | 6                | 5   | 1                 | 5                 | 17077.4609            | 0.0013                  |
| 6  | 1                | 6                | 5   | 0                 | 5                 | 17779.4366            | -0.0007                 |
| 4  | 2                | 3                | 3   | 1                 | 2                 | 17824.4309            | 0.0021                  |

**Table S27.** Assigned transitions for the parent species of conformer II of DAE.

| J' | K <sub>a</sub> ' | K <sub>c</sub> ' | J'' | K <sub>a</sub> '' | K <sub>c</sub> '' | V <sub>obs</sub> /MHz | V <sub>obs</sub> - calc |
|----|------------------|------------------|-----|-------------------|-------------------|-----------------------|-------------------------|
| 1  | 1                | 1                | 0   | 0                 | 0                 | 6917.6622             | -0.0019                 |
| 7  | 1                | 6                | 6   | 2                 | 5                 | 7470.8108             | -0.0014                 |
| 5  | 0                | 5                | 4   | 1                 | 4                 | 9069.8674             | 0.0008                  |
| 2  | 1                | 2                | 1   | 0                 | 1                 | 9196.2088             | -0.0007                 |
| 8  | 1                | 7                | 8   | 0                 | 8                 | 10512.8007            | 0.0010                  |
| 8  | 1                | 7                | 7   | 2                 | 6                 | 10847.2913            | -0.0002                 |
| 3  | 1                | 3                | 2   | 0                 | 2                 | 11352.4680            | -0.0005                 |
| 9  | 2                | 7                | 9   | 1                 | 8                 | 11359.1432            | -0.0014                 |
| 7  | 2                | 5                | 7   | 1                 | 6                 | 11423.5961            | 0.0012                  |
| 6  | 2                | 4                | 6   | 1                 | 5                 | 11692.6246            | 0.0003                  |
| 6  | 0                | 6                | 5   | 1                 | 5                 | 11924.2246            | 0.0004                  |
| 5  | 2                | 3                | 5   | 1                 | 4                 | 12053.5069            | 0.0006                  |
| 9  | 1                | 8                | 9   | 0                 | 9                 | 12300.7832            | 0.0023                  |
| 4  | 2                | 2                | 4   | 1                 | 3                 | 12452.7865            | 0.0014                  |
| 4  | 1                | 4                | 3   | 0                 | 3                 | 13400.1281            | 0.0000                  |
| 2  | 2                | 1                | 2   | 1                 | 2                 | 13917.2795            | -0.0010                 |
| 9  | 1                | 8                | 8   | 2                 | 7                 | 14273.5016            | 0.0010                  |
| 7  | 0                | 7                | 6   | 1                 | 6                 | 14749.7539            | 0.0003                  |
| 4  | 2                | 3                | 4   | 1                 | 4                 | 14820.7539            | 0.0029                  |
| 5  | 1                | 5                | 4   | 0                 | 4                 | 15360.9012            | 0.0000                  |
| 5  | 2                | 4                | 5   | 1                 | 5                 | 15472.7621            | 0.0024                  |
| 6  | 2                | 5                | 6   | 1                 | 6                 | 16260.8371            | 0.0000                  |
| 7  | 2                | 6                | 7   | 1                 | 7                 | 17185.9283            | -0.0008                 |
| 6  | 1                | 6                | 5   | 0                 | 5                 | 17263.2758            | 0.0010                  |
| 8  | 0                | 8                | 7   | 1                 | 7                 | 17520.4215            | 0.0005                  |
| 10 | 1                | 9                | 9   | 2                 | 8                 | 17724.1511            | -0.0014                 |
| 8  | 2                | 7                | 8   | 1                 | 8                 | 18247.6218            | -0.0036                 |
| 2  | 2                | 1                | 1   | 1                 | 0                 | 18474.3681            | -0.0021                 |

|   |   |   |   |   |   |            |         |
|---|---|---|---|---|---|------------|---------|
| 2 | 2 | 0 | 1 | 1 | 1 | 18737.7753 | -0.0019 |
| 7 | 1 | 7 | 6 | 0 | 6 | 19139.6121 | 0.0015  |

**Table S28.** Assigned transitions for the parent species of conformer III of DAE.

| J' | K <sub>a</sub> ' | K <sub>c</sub> ' | J'' | K <sub>a</sub> '' | K <sub>c</sub> '' | $\nu_{\text{obs}}/\text{MHz}$ | $\nu_{\text{obs}} - \nu_{\text{calc}}$ |
|----|------------------|------------------|-----|-------------------|-------------------|-------------------------------|----------------------------------------|
| 1  | 1                | 0                | 1   | 0                 | 1                 | 6341.1443                     | 0.0018                                 |
| 2  | 1                | 1                | 2   | 0                 | 2                 | 6422.6714                     | -0.0012                                |
| 3  | 1                | 2                | 3   | 0                 | 3                 | 6546.4171                     | -0.0012                                |
| 4  | 1                | 3                | 4   | 0                 | 4                 | 6714.1098                     | -0.0009                                |
| 3  | 1                | 3                | 2   | 1                 | 2                 | 6920.4585                     | 0.0002                                 |
| 3  | 0                | 3                | 2   | 0                 | 2                 | 7038.8404                     | -0.0002                                |
| 3  | 2                | 1                | 2   | 2                 | 0                 | 7045.3059                     | 0.0030                                 |
| 6  | 0                | 6                | 5   | 1                 | 4                 | 7128.5293                     | -0.0039                                |
| 3  | 1                | 2                | 2   | 1                 | 1                 | 7162.5858                     | -0.0006                                |
| 6  | 1                | 5                | 6   | 0                 | 6                 | 7191.0221                     | 0.0036                                 |
| 7  | 1                | 6                | 7   | 0                 | 7                 | 7506.3569                     | -0.0028                                |
| 6  | 0                | 6                | 5   | 1                 | 5                 | 8339.0598                     | -0.0012                                |
| 1  | 1                | 1                | 0   | 0                 | 0                 | 8607.7559                     | -0.0015                                |
| 1  | 1                | 0                | 0   | 0                 | 0                 | 8688.4682                     | -0.0007                                |
| 4  | 1                | 4                | 3   | 1                 | 3                 | 9226.3409                     | 0.0003                                 |
| 4  | 0                | 4                | 3   | 0                 | 3                 | 9381.4621                     | 0.0000                                 |
| 4  | 2                | 3                | 3   | 2                 | 2                 | 9388.9567                     | -0.0008                                |
| 4  | 3                | 2                | 3   | 3                 | 1                 | 9391.5326                     | 0.0023                                 |
| 4  | 3                | 1                | 3   | 3                 | 0                 | 9391.5617                     | 0.0035                                 |
| 4  | 2                | 2                | 3   | 2                 | 1                 | 9396.7033                     | -0.0004                                |
| 4  | 1                | 3                | 3   | 1                 | 2                 | 9549.1536                     | -0.0009                                |
| 2  | 1                | 2                | 1   | 0                 | 1                 | 10874.4058                    | -0.0007                                |
| 7  | 0                | 7                | 6   | 1                 | 6                 | 10891.0777                    | 0.0008                                 |
| 2  | 1                | 1                | 1   | 0                 | 1                 | 11116.5395                    | -0.0013                                |



---

|   |   |   |   |   |   |            |         |
|---|---|---|---|---|---|------------|---------|
| 8 | 0 | 8 | 7 | 1 | 6 | 11206.9307 | -0.0011 |
| 5 | 1 | 5 | 4 | 1 | 4 | 11531.4345 | 0.0005  |
| 5 | 0 | 5 | 4 | 0 | 4 | 11720.9584 | 0.0001  |
| 5 | 2 | 4 | 4 | 2 | 3 | 11735.1573 | -0.0005 |
| 5 | 4 | 1 | 4 | 4 | 0 | 11739.9058 | 0.0018  |
| 5 | 4 | 2 | 4 | 4 | 1 | 11739.9058 | 0.0019  |
| 5 | 3 | 3 | 4 | 3 | 2 | 11740.0385 | 0.0010  |
| 5 | 3 | 2 | 4 | 3 | 1 | 11740.1340 | -0.0011 |
| 5 | 2 | 3 | 4 | 2 | 2 | 11750.6359 | -0.0008 |
| 5 | 1 | 4 | 4 | 1 | 3 | 11934.8847 | -0.0005 |
| 3 | 1 | 3 | 2 | 0 | 2 | 13100.9965 | 0.0000  |
| 8 | 0 | 8 | 7 | 1 | 7 | 13465.8265 | 0.0023  |
| 3 | 1 | 2 | 2 | 0 | 2 | 13585.2565 | -0.0024 |
| 6 | 1 | 6 | 5 | 1 | 5 | 13835.5586 | 0.0005  |
| 6 | 0 | 6 | 5 | 0 | 5 | 14056.5719 | 0.0008  |
| 6 | 2 | 5 | 5 | 2 | 4 | 14080.6658 | -0.0002 |
| 6 | 4 | 3 | 5 | 4 | 2 | 14088.3461 | -0.0025 |
| 6 | 4 | 2 | 5 | 4 | 1 | 14088.3461 | -0.0033 |
| 6 | 3 | 4 | 5 | 3 | 3 | 14088.9344 | -0.0013 |
| 6 | 3 | 3 | 5 | 3 | 2 | 14089.1955 | -0.0004 |
| 6 | 2 | 4 | 5 | 2 | 3 | 14107.7108 | -0.0004 |
| 6 | 1 | 5 | 5 | 1 | 4 | 14319.5518 | 0.0000  |
| 4 | 1 | 4 | 3 | 0 | 3 | 15288.4978 | 0.0013  |
| 9 | 0 | 9 | 8 | 1 | 8 | 16058.7129 | -0.0012 |
| 4 | 1 | 3 | 3 | 0 | 3 | 16095.5712 | -0.0016 |
| 7 | 1 | 7 | 6 | 1 | 6 | 16138.5444 | 0.0001  |
| 7 | 0 | 7 | 6 | 0 | 6 | 16387.5749 | 0.0009  |
| 7 | 2 | 6 | 6 | 2 | 5 | 16425.3432 | -0.0004 |
| 7 | 4 | 3 | 6 | 4 | 2 | 16437.0485 | -0.0004 |
| 7 | 4 | 4 | 6 | 4 | 3 | 16437.0485 | 0.0022  |
| 7 | 3 | 5 | 6 | 3 | 4 | 16438.2780 | -0.0002 |

---

|   |   |   |   |   |   |            |         |
|---|---|---|---|---|---|------------|---------|
| 7 | 3 | 4 | 6 | 3 | 3 | 16438.8633 | -0.0002 |
| 7 | 2 | 5 | 6 | 2 | 4 | 16468.5053 | 0.0000  |
| 7 | 1 | 6 | 6 | 1 | 5 | 16702.9162 | 0.0010  |
| 5 | 1 | 5 | 4 | 0 | 4 | 17438.4685 | 0.0002  |
| 8 | 1 | 8 | 7 | 1 | 7 | 18440.2371 | 0.0000  |
| 5 | 1 | 4 | 4 | 0 | 4 | 18648.9969 | 0.0009  |
| 8 | 0 | 8 | 7 | 0 | 7 | 18713.2933 | 0.0017  |
| 8 | 2 | 7 | 7 | 2 | 6 | 18769.0537 | 0.0004  |
| 8 | 3 | 6 | 7 | 3 | 5 | 18788.1046 | -0.0005 |
| 8 | 3 | 5 | 7 | 3 | 4 | 18789.2734 | -0.0013 |
| 8 | 2 | 6 | 7 | 2 | 5 | 18833.5454 | 0.0002  |
| 6 | 1 | 6 | 5 | 0 | 5 | 19553.0705 | 0.0023  |

**Table S29.** Assigned transitions for the parent species of conformer IV of DAE.

| J' | K <sub>a</sub> ' | K <sub>c</sub> ' | J'' | K <sub>a</sub> '' | K <sub>c</sub> '' | V <sub>obs</sub> /MHz | V <sub>obs</sub> - calc |
|----|------------------|------------------|-----|-------------------|-------------------|-----------------------|-------------------------|
| 2  | 1                | 1                | 2   | 0                 | 2                 | 7064.2598             | 0.0001                  |
| 3  | 1                | 2                | 3   | 0                 | 3                 | 7210.2820             | 0.0022                  |
| 4  | 1                | 3                | 4   | 0                 | 4                 | 7408.3827             | 0.0006                  |
| 5  | 1                | 4                | 5   | 0                 | 5                 | 7661.4545             | 0.0006                  |
| 6  | 1                | 5                | 6   | 0                 | 6                 | 7973.0463             | 0.0000                  |
| 7  | 1                | 6                | 7   | 0                 | 7                 | 8347.3126             | -0.0007                 |
| 4  | 0                | 4                | 3   | 0                 | 3                 | 8492.2806             | 0.0001                  |
| 4  | 2                | 3                | 3   | 2                 | 2                 | 8501.4843             | -0.0005                 |
| 4  | 2                | 2                | 3   | 2                 | 1                 | 8511.2827             | -0.0018                 |
| 4  | 1                | 3                | 3   | 1                 | 2                 | 8690.3815             | -0.0012                 |
| 8  | 1                | 7                | 8   | 0                 | 8                 | 8788.9183             | 0.0007                  |
| 7  | 0                | 7                | 6   | 1                 | 6                 | 8847.8441             | 0.0025                  |
| 1  | 1                | 1                | 0   | 0                 | 0                 | 8998.5394             | -0.0030                 |
| 5  | 1                | 5                | 4   | 1                 | 4                 | 10385.5982            | 0.0012                  |

---

|    |   |    |    |   |    |            |         |
|----|---|----|----|---|----|------------|---------|
| 5  | 0 | 5  | 4  | 0 | 4  | 10607.9880 | 0.0005  |
| 5  | 2 | 4  | 4  | 2 | 3  | 10625.5959 | -0.0005 |
| 5  | 2 | 3  | 4  | 2 | 2  | 10645.1752 | -0.0008 |
| 5  | 1 | 4  | 4  | 1 | 3  | 10861.0581 | -0.0011 |
| 2  | 1 | 2  | 1  | 0 | 1  | 11028.9667 | -0.0005 |
| 8  | 0 | 8  | 7  | 1 | 7  | 11237.0624 | 0.0001  |
| 6  | 1 | 6  | 5  | 1 | 5  | 12460.0747 | 0.0009  |
| 6  | 0 | 6  | 5  | 0 | 5  | 12718.8296 | 0.0008  |
| 3  | 2 | 1  | 4  | 1 | 4  | 12742.5673 | 0.0000  |
| 3  | 1 | 3  | 2  | 0 | 2  | 13012.2035 | -0.0006 |
| 9  | 0 | 9  | 8  | 1 | 8  | 13645.9345 | -0.0017 |
| 7  | 1 | 7  | 6  | 1 | 6  | 14533.1665 | 0.0009  |
| 7  | 0 | 7  | 6  | 0 | 6  | 14823.9042 | 0.0003  |
| 4  | 1 | 4  | 3  | 0 | 3  | 14949.4888 | 0.0004  |
| 7  | 1 | 6  | 6  | 1 | 5  | 15198.1705 | -0.0003 |
| 10 | 0 | 10 | 9  | 1 | 9  | 16068.3305 | -0.0014 |
| 8  | 1 | 8  | 7  | 1 | 7  | 16604.6891 | 0.0010  |
| 5  | 1 | 5  | 4  | 0 | 4  | 16842.8047 | 0.0000  |
| 8  | 0 | 8  | 7  | 0 | 7  | 16922.3865 | 0.0002  |
| 8  | 2 | 7  | 7  | 2 | 6  | 16992.2265 | -0.0004 |
| 8  | 1 | 7  | 7  | 1 | 6  | 17363.9909 | 0.0004  |
| 11 | 0 | 11 | 10 | 1 | 10 | 18497.9009 | 0.0007  |
| 9  | 1 | 9  | 8  | 1 | 8  | 18674.4754 | -0.0016 |
| 6  | 1 | 6  | 5  | 0 | 5  | 18694.8915 | 0.0004  |
| 9  | 0 | 9  | 8  | 0 | 8  | 19013.5623 | 0.0001  |
| 9  | 1 | 8  | 8  | 1 | 7  | 19527.5410 | 0.0010  |

---

**Table S30.** Assigned transitions for the parent species of conformer V of DAE.

| J' | K <sub>a</sub> ' | K <sub>c</sub> ' | J'' | K <sub>a</sub> '' | K <sub>c</sub> '' | V <sub>obs</sub> /MHz | V <sub>obs</sub> - calc |
|----|------------------|------------------|-----|-------------------|-------------------|-----------------------|-------------------------|
| 5  | 0                | 5                | 4   | 1                 | 4                 | 6956.5395             | 0.0000                  |
| 7  | 1                | 6                | 7   | 0                 | 7                 | 7019.9563             | -0.0014                 |
| 3  | 1                | 2                | 2   | 1                 | 1                 | 7060.7232             | 0.0002                  |
| 1  | 1                | 1                | 0   | 0                 | 0                 | 7279.9820             | -0.0015                 |
| 1  | 1                | 0                | 0   | 0                 | 0                 | 7404.9010             | -0.0018                 |
| 6  | 0                | 6                | 5   | 1                 | 4                 | 7616.9361             | -0.0020                 |
| 8  | 1                | 7                | 8   | 0                 | 8                 | 7657.9216             | 0.0015                  |
| 9  | 1                | 8                | 8   | 2                 | 6                 | 7676.1581             | -0.0001                 |
| 9  | 1                | 8                | 8   | 2                 | 7                 | 8152.2016             | -0.0004                 |
| 4  | 1                | 4                | 3   | 1                 | 3                 | 8912.0019             | 0.0004                  |
| 4  | 0                | 4                | 3   | 0                 | 3                 | 9143.1777             | 0.0005                  |
| 4  | 2                | 3                | 3   | 2                 | 2                 | 9164.7815             | 0.0000                  |
| 4  | 3                | 2                | 3   | 3                 | 1                 | 9171.4955             | -0.0016                 |
| 4  | 3                | 1                | 3   | 3                 | 0                 | 9171.6559             | -0.0023                 |
| 4  | 1                | 3                | 3   | 1                 | 2                 | 9411.4632             | 0.0004                  |
| 7  | 0                | 7                | 6   | 1                 | 5                 | 9425.6808             | 0.0008                  |
| 2  | 1                | 2                | 1   | 0                 | 1                 | 9446.6948             | 0.0001                  |
| 6  | 0                | 6                | 5   | 1                 | 5                 | 9489.7842             | 0.0000                  |
| 2  | 1                | 1                | 1   | 0                 | 1                 | 9821.4459             | -0.0010                 |
| 10 | 1                | 9                | 9   | 2                 | 7                 | 10265.6731            | -0.0007                 |
| 10 | 1                | 9                | 9   | 2                 | 8                 | 11005.1428            | -0.0001                 |
| 8  | 0                | 8                | 7   | 1                 | 6                 | 11123.7553            | -0.0006                 |
| 5  | 1                | 5                | 4   | 1                 | 4                 | 11135.7695            | 0.0005                  |
| 5  | 3                | 3                | 6   | 2                 | 4                 | 11371.2898            | 0.0025                  |
| 5  | 3                | 2                | 6   | 2                 | 4                 | 11372.0386            | 0.0000                  |
| 5  | 0                | 5                | 4   | 0                 | 4                 | 11411.6940            | 0.0007                  |
| 5  | 2                | 4                | 4   | 2                 | 3                 | 11452.9930            | 0.0004                  |
| 5  | 4                | 1                | 4   | 4                 | 0                 | 11464.3723            | 0.0017                  |

---

|    |   |    |    |   |    |            |         |
|----|---|----|----|---|----|------------|---------|
| 5  | 3 | 3  | 4  | 3 | 2  | 11466.2735 | 0.0006  |
| 5  | 3 | 2  | 4  | 3 | 1  | 11466.8351 | -0.0011 |
| 5  | 2 | 3  | 4  | 2 | 2  | 11499.0724 | 0.0003  |
| 5  | 3 | 3  | 6  | 2 | 5  | 11532.2312 | -0.0013 |
| 5  | 3 | 2  | 6  | 2 | 5  | 11532.9865 | 0.0025  |
| 3  | 1 | 3  | 2  | 0 | 2  | 11551.8310 | 0.0005  |
| 5  | 1 | 4  | 4  | 1 | 3  | 11759.6929 | 0.0003  |
| 7  | 0 | 7  | 6  | 1 | 6  | 12046.3502 | 0.0005  |
| 3  | 1 | 2  | 2  | 0 | 2  | 12301.2926 | 0.0008  |
| 12 | 2 | 10 | 12 | 1 | 11 | 12682.9429 | 0.0002  |
| 9  | 0 | 9  | 8  | 1 | 7  | 12701.4267 | 0.0007  |
| 11 | 2 | 9  | 11 | 1 | 10 | 12776.2649 | 0.0001  |
| 10 | 2 | 8  | 10 | 1 | 9  | 12943.7947 | -0.0007 |
| 8  | 2 | 7  | 8  | 1 | 7  | 12959.6231 | 0.0000  |
| 9  | 2 | 7  | 9  | 1 | 8  | 13169.3346 | -0.0006 |
| 6  | 1 | 6  | 5  | 1 | 5  | 13356.8603 | 0.0004  |
| 8  | 2 | 6  | 8  | 1 | 7  | 13435.6666 | -0.0001 |
| 7  | 2 | 6  | 7  | 1 | 6  | 13437.1591 | 0.0000  |
| 4  | 1 | 4  | 3  | 0 | 3  | 13598.3312 | 0.0002  |
| 6  | 0 | 6  | 5  | 0 | 5  | 13669.0142 | 0.0004  |
| 4  | 3 | 2  | 5  | 2 | 3  | 13724.4038 | -0.0008 |
| 4  | 3 | 1  | 5  | 2 | 3  | 13724.5907 | -0.0019 |
| 7  | 2 | 5  | 7  | 1 | 6  | 13725.1931 | 0.0000  |
| 6  | 2 | 5  | 5  | 2 | 4  | 13739.2174 | 0.0002  |
| 6  | 4 | 3  | 5  | 4 | 2  | 13758.8041 | -0.0005 |
| 6  | 4 | 2  | 5  | 4 | 1  | 13758.8114 | -0.0025 |
| 6  | 3 | 4  | 5  | 3 | 3  | 13762.1714 | -0.0002 |
| 6  | 3 | 3  | 5  | 3 | 2  | 13763.6725 | 0.0000  |
| 4  | 3 | 2  | 5  | 2 | 4  | 13805.1771 | 0.0002  |
| 4  | 3 | 1  | 5  | 2 | 4  | 13805.3636 | -0.0012 |
| 6  | 2 | 4  | 5  | 2 | 3  | 13819.3906 | 0.0003  |

---

---

|   |   |   |   |   |   |            |         |
|---|---|---|---|---|---|------------|---------|
| 6 | 2 | 5 | 6 | 1 | 5 | 13859.7338 | -0.0004 |
| 6 | 2 | 4 | 6 | 1 | 5 | 14020.6797 | 0.0001  |
| 6 | 1 | 5 | 5 | 1 | 4 | 14104.6838 | 0.0004  |
| 5 | 2 | 4 | 5 | 1 | 4 | 14225.2004 | 0.0000  |
| 5 | 2 | 3 | 5 | 1 | 4 | 14305.9726 | 0.0000  |
| 4 | 2 | 3 | 4 | 1 | 3 | 14531.9007 | 0.0002  |
| 4 | 2 | 2 | 4 | 1 | 3 | 14566.5932 | 0.0000  |
| 8 | 0 | 8 | 7 | 1 | 7 | 14615.1838 | 0.0005  |
| 3 | 2 | 2 | 3 | 1 | 2 | 14778.5820 | 0.0002  |
| 3 | 2 | 1 | 3 | 1 | 2 | 14790.1598 | 0.0004  |
| 4 | 1 | 3 | 3 | 0 | 3 | 14847.2529 | -0.0005 |
| 2 | 2 | 1 | 2 | 1 | 1 | 14964.3265 | 0.0012  |
| 2 | 2 | 0 | 2 | 1 | 1 | 14966.6429 | 0.0008  |
| 2 | 2 | 1 | 2 | 1 | 2 | 15339.0784 | 0.0008  |
| 2 | 2 | 0 | 2 | 1 | 2 | 15341.3955 | 0.0012  |
| 3 | 2 | 2 | 3 | 1 | 3 | 15528.0440 | 0.0010  |
| 3 | 2 | 1 | 3 | 1 | 3 | 15539.6238 | 0.0032  |
| 7 | 1 | 7 | 6 | 1 | 6 | 15574.8801 | 0.0000  |
| 5 | 1 | 5 | 4 | 0 | 4 | 15590.9235 | 0.0008  |
| 4 | 2 | 3 | 4 | 1 | 4 | 15780.8216 | -0.0013 |
| 4 | 2 | 2 | 4 | 1 | 4 | 15815.5133 | -0.0023 |
| 7 | 0 | 7 | 6 | 0 | 6 | 15913.4253 | 0.0002  |
| 7 | 2 | 6 | 6 | 2 | 5 | 16023.0627 | 0.0002  |
| 7 | 3 | 5 | 6 | 3 | 4 | 16059.2767 | -0.0008 |
| 7 | 3 | 4 | 6 | 3 | 3 | 16062.6500 | 0.0010  |
| 5 | 2 | 4 | 5 | 1 | 5 | 16098.0456 | -0.0009 |
| 7 | 2 | 5 | 6 | 2 | 4 | 16150.1516 | 0.0004  |
| 5 | 2 | 3 | 5 | 1 | 5 | 16178.8179 | -0.0008 |
| 7 | 1 | 6 | 6 | 1 | 5 | 16445.6382 | 0.0005  |
| 6 | 2 | 5 | 6 | 1 | 6 | 16480.4026 | -0.0012 |
| 6 | 2 | 4 | 6 | 1 | 6 | 16641.3502 | 0.0009  |

---

|   |   |   |   |   |   |            |         |
|---|---|---|---|---|---|------------|---------|
| 7 | 2 | 6 | 7 | 1 | 7 | 16928.5868 | 0.0005  |
| 9 | 0 | 9 | 8 | 1 | 8 | 17185.0213 | -0.0004 |
| 7 | 2 | 5 | 7 | 1 | 7 | 17216.6230 | 0.0026  |
| 8 | 2 | 7 | 8 | 1 | 8 | 17443.2188 | 0.0000  |
| 5 | 1 | 4 | 4 | 0 | 4 | 17463.7692 | 0.0003  |
| 6 | 1 | 6 | 5 | 0 | 5 | 17536.0897 | 0.0004  |
| 8 | 1 | 8 | 7 | 1 | 7 | 17789.5070 | -0.0004 |
| 8 | 2 | 6 | 8 | 1 | 8 | 17919.2615 | -0.0011 |
| 9 | 2 | 8 | 9 | 1 | 9 | 18024.7899 | 0.0004  |
| 8 | 0 | 8 | 7 | 0 | 7 | 18143.7141 | 0.0004  |
| 8 | 2 | 7 | 7 | 2 | 6 | 18304.1401 | 0.0001  |
| 8 | 3 | 6 | 7 | 3 | 5 | 18357.6030 | -0.0002 |
| 8 | 3 | 5 | 7 | 3 | 4 | 18364.3308 | 0.0008  |
| 8 | 2 | 6 | 7 | 2 | 5 | 18492.1500 | 0.0002  |
| 8 | 1 | 7 | 7 | 1 | 6 | 18781.6763 | 0.0002  |
| 7 | 1 | 7 | 6 | 0 | 6 | 19441.9557 | 0.0001  |
| 2 | 2 | 1 | 1 | 1 | 0 | 19672.4731 | 0.0002  |
| 2 | 2 | 0 | 1 | 1 | 0 | 19674.7889 | -0.0007 |
| 2 | 2 | 1 | 1 | 1 | 1 | 19797.3889 | -0.0031 |
| 2 | 2 | 0 | 1 | 1 | 1 | 19799.7066 | -0.0022 |

**Table S31.** Assigned transitions for the parent species of conformer VI of DAE.

| J' | K <sub>a</sub> ' | K <sub>c</sub> ' | J'' | K <sub>a</sub> '' | K <sub>c</sub> '' | v <sub>obs</sub> /MHz | v <sub>obs</sub> - calc |
|----|------------------|------------------|-----|-------------------|-------------------|-----------------------|-------------------------|
| 2  | 1                | 1                | 2   | 0                 | 2                 | 6447.4081             | 0.0009                  |
| 3  | 1                | 3                | 2   | 1                 | 2                 | 6453.4146             | 0.0000                  |
| 3  | 1                | 2                | 3   | 0                 | 3                 | 6556.5148             | 0.0015                  |
| 3  | 0                | 3                | 2   | 0                 | 2                 | 6558.3982             | 0.0005                  |
| 3  | 1                | 2                | 2   | 1                 | 1                 | 6667.5037             | -0.0001                 |
| 4  | 1                | 3                | 4   | 0                 | 4                 | 6704.0837             | 0.0027                  |

---

|   |   |   |   |   |   |            |         |
|---|---|---|---|---|---|------------|---------|
| 5 | 1 | 4 | 5 | 0 | 5 | 6891.8894  | 0.0020  |
| 6 | 1 | 5 | 6 | 0 | 6 | 7122.1280  | 0.0000  |
| 6 | 0 | 6 | 5 | 1 | 5 | 7278.8609  | 0.0025  |
| 7 | 1 | 6 | 7 | 0 | 7 | 7397.3864  | -0.0019 |
| 8 | 1 | 7 | 8 | 0 | 8 | 7720.6022  | -0.0015 |
| 9 | 1 | 8 | 9 | 0 | 9 | 8094.9997  | 0.0008  |
| 7 | 0 | 7 | 6 | 1 | 5 | 8152.5418  | -0.0009 |
| 1 | 1 | 1 | 0 | 0 | 0 | 8490.9940  | -0.0020 |
| 1 | 1 | 0 | 0 | 0 | 0 | 8562.3655  | 0.0018  |
| 4 | 1 | 4 | 3 | 1 | 3 | 8603.8338  | 0.0000  |
| 4 | 0 | 4 | 3 | 0 | 3 | 8741.6917  | -0.0001 |
| 4 | 2 | 3 | 3 | 2 | 2 | 8747.3960  | -0.0005 |
| 4 | 2 | 2 | 3 | 2 | 1 | 8753.4181  | -0.0001 |
| 4 | 1 | 3 | 3 | 1 | 2 | 8889.2591  | -0.0003 |
| 7 | 0 | 7 | 6 | 1 | 6 | 9650.8145  | -0.0013 |
| 2 | 1 | 2 | 1 | 0 | 1 | 10606.5857 | -0.0008 |
| 5 | 1 | 5 | 4 | 1 | 4 | 10753.6469 | 0.0003  |
| 2 | 1 | 1 | 1 | 0 | 1 | 10820.6862 | -0.0005 |
| 5 | 0 | 5 | 4 | 0 | 4 | 10922.5607 | 0.0006  |
| 5 | 2 | 4 | 4 | 2 | 3 | 10933.4458 | 0.0002  |
| 5 | 4 | 2 | 4 | 4 | 1 | 10936.6903 | 0.0004  |
| 5 | 4 | 1 | 4 | 4 | 0 | 10936.6903 | 0.0003  |
| 5 | 3 | 3 | 4 | 3 | 2 | 10937.0563 | -0.0016 |
| 5 | 3 | 2 | 4 | 3 | 1 | 10937.1255 | 0.0009  |
| 5 | 2 | 3 | 4 | 2 | 2 | 10945.4809 | 0.0008  |
| 5 | 1 | 4 | 4 | 1 | 3 | 11110.3663 | -0.0001 |
| 8 | 0 | 8 | 7 | 1 | 7 | 12044.7144 | 0.0004  |
| 3 | 1 | 3 | 2 | 0 | 2 | 12686.7208 | -0.0005 |
| 6 | 1 | 6 | 5 | 1 | 5 | 12902.7134 | 0.0002  |
| 6 | 0 | 6 | 5 | 0 | 5 | 13100.4106 | 0.0000  |
| 3 | 1 | 2 | 2 | 0 | 2 | 13114.9103 | -0.0007 |

---



---

|    |   |    |   |   |   |            |         |
|----|---|----|---|---|---|------------|---------|
| 6  | 2 | 5  | 5 | 2 | 4 | 13118.9619 | 0.0005  |
| 6  | 4 | 3  | 5 | 4 | 2 | 13124.4010 | 0.0010  |
| 6  | 4 | 2  | 5 | 4 | 1 | 13124.4010 | 0.0005  |
| 6  | 3 | 4  | 5 | 3 | 3 | 13125.1793 | -0.0001 |
| 6  | 3 | 3  | 5 | 3 | 2 | 13125.3572 | -0.0001 |
| 6  | 2 | 4  | 5 | 2 | 3 | 13139.9945 | 0.0000  |
| 6  | 1 | 5  | 5 | 1 | 4 | 13330.6509 | -0.0001 |
| 10 | 0 | 10 | 9 | 1 | 8 | 13675.7655 | 0.0002  |
| 9  | 0 | 9  | 8 | 1 | 8 | 14456.9286 | -0.0012 |
| 4  | 1 | 4  | 3 | 0 | 3 | 14732.1581 | 0.0005  |
| 7  | 1 | 7  | 6 | 1 | 6 | 15050.9018 | 0.0000  |
| 7  | 0 | 7  | 6 | 0 | 6 | 15274.6712 | 0.0004  |
| 7  | 2 | 6  | 6 | 2 | 5 | 15303.8381 | 0.0002  |
| 7  | 4 | 4  | 6 | 4 | 3 | 15312.3114 | -0.0010 |
| 7  | 4 | 3  | 6 | 4 | 2 | 15312.3114 | -0.0027 |
| 7  | 3 | 5  | 6 | 3 | 4 | 15313.6620 | 0.0023  |
| 7  | 3 | 4  | 6 | 3 | 3 | 15314.0596 | -0.0001 |
| 7  | 2 | 5  | 6 | 2 | 4 | 15337.4209 | -0.0003 |
| 4  | 1 | 3  | 3 | 0 | 3 | 15445.7705 | -0.0022 |
| 7  | 1 | 6  | 6 | 1 | 5 | 15549.9313 | 0.0001  |
| 5  | 1 | 5  | 4 | 0 | 4 | 16744.1120 | -0.0002 |
| 10 | 0 | 10 | 9 | 1 | 9 | 16883.5294 | 0.0007  |
| 8  | 1 | 8  | 7 | 1 | 7 | 17198.0893 | -0.0006 |
| 8  | 0 | 8  | 7 | 0 | 7 | 17444.7998 | -0.0001 |
| 8  | 2 | 7  | 7 | 2 | 6 | 17487.9700 | 0.0007  |
| 8  | 4 | 4  | 7 | 4 | 3 | 17500.4636 | -0.0018 |
| 8  | 4 | 5  | 7 | 4 | 4 | 17500.4636 | 0.0027  |
| 8  | 3 | 6  | 7 | 3 | 5 | 17502.5345 | -0.0002 |
| 8  | 3 | 5  | 7 | 3 | 4 | 17503.3346 | 0.0002  |
| 8  | 2 | 6  | 7 | 2 | 5 | 17538.1875 | -0.0003 |
| 8  | 1 | 7  | 7 | 1 | 6 | 17768.0158 | 0.0004  |

---

|    |   |    |    |   |    |            |         |
|----|---|----|----|---|----|------------|---------|
| 5  | 1 | 4  | 4  | 0 | 4  | 17814.4473 | -0.0001 |
| 6  | 1 | 6  | 5  | 0 | 5  | 18724.2662 | 0.0008  |
| 11 | 0 | 11 | 10 | 1 | 10 | 19320.3424 | 0.0002  |
| 9  | 1 | 9  | 8  | 1 | 8  | 19344.1646 | -0.0008 |
| 9  | 0 | 9  | 8  | 0 | 8  | 19610.3060 | 0.0001  |
| 9  | 2 | 8  | 8  | 2 | 7  | 19671.2489 | -0.0011 |

**Table S32.** Assigned transitions for the parent species of conformer VII of DAE.

| J' | K <sub>a</sub> ' | K <sub>c</sub> ' | J'' | K <sub>a</sub> '' | K <sub>c</sub> '' | V <sub>obs</sub> /MHz | V <sub>obs</sub> - calc |
|----|------------------|------------------|-----|-------------------|-------------------|-----------------------|-------------------------|
| 1  | 1                | 1                | 0   | 0                 | 0                 | 6556.0985             | 0.0034                  |
| 1  | 1                | 0                | 0   | 0                 | 0                 | 6707.6312             | 0.0005                  |
| 4  | 0                | 4                | 3   | 1                 | 2                 | 7203.8999             | -0.0003                 |
| 6  | 1                | 5                | 5   | 2                 | 3                 | 7317.0830             | -0.0001                 |
| 4  | 0                | 4                | 3   | 1                 | 3                 | 8112.8981             | -0.0010                 |
| 3  | 1                | 3                | 2   | 1                 | 2                 | 8383.6364             | -0.0001                 |
| 3  | 0                | 3                | 2   | 0                 | 2                 | 8595.3452             | 0.0002                  |
| 3  | 1                | 2                | 2   | 1                 | 1                 | 8838.0538             | -0.0004                 |
| 2  | 1                | 2                | 1   | 0                 | 1                 | 9275.8497             | -0.0002                 |
| 8  | 2                | 6                | 8   | 1                 | 7                 | 9583.2370             | -0.0006                 |
| 5  | 0                | 5                | 4   | 1                 | 3                 | 9690.8753             | 0.0006                  |
| 2  | 1                | 1                | 1   | 0                 | 1                 | 9730.4320             | 0.0008                  |
| 6  | 2                | 5                | 6   | 1                 | 5                 | 9730.6084             | -0.0010                 |
| 7  | 2                | 5                | 7   | 1                 | 6                 | 9788.5608             | 0.0013                  |
| 6  | 2                | 4                | 6   | 1                 | 5                 | 10044.6220            | -0.0002                 |
| 5  | 2                | 4                | 5   | 1                 | 4                 | 10165.7799            | 0.0018                  |
| 5  | 2                | 3                | 5   | 1                 | 4                 | 10324.3133            | 0.0002                  |
| 7  | 1                | 6                | 6   | 2                 | 4                 | 10516.2061            | -0.0007                 |
| 4  | 2                | 3                | 4   | 1                 | 3                 | 10533.1644            | -0.0001                 |
| 4  | 2                | 2                | 4   | 1                 | 3                 | 10601.5023            | -0.0031                 |

---

|   |   |   |   |   |   |            |         |
|---|---|---|---|---|---|------------|---------|
| 3 | 2 | 2 | 3 | 1 | 2 | 10829.9153 | 0.0022  |
| 3 | 2 | 1 | 3 | 1 | 2 | 10852.7623 | -0.0021 |
| 2 | 2 | 1 | 2 | 1 | 1 | 11054.0055 | -0.0021 |
| 2 | 2 | 0 | 2 | 1 | 1 | 11058.5849 | 0.0005  |
| 4 | 1 | 4 | 3 | 1 | 3 | 11172.9052 | 0.0003  |
| 5 | 0 | 5 | 4 | 1 | 4 | 11205.2424 | 0.0012  |
| 4 | 0 | 4 | 3 | 0 | 3 | 11439.1323 | 0.0004  |
| 4 | 2 | 3 | 3 | 2 | 2 | 11481.5245 | 0.0005  |
| 4 | 3 | 2 | 3 | 3 | 1 | 11494.5330 | 0.0013  |
| 4 | 2 | 2 | 3 | 2 | 1 | 11527.0135 | 0.0000  |
| 4 | 1 | 3 | 3 | 1 | 2 | 11778.2722 | -0.0002 |
| 3 | 1 | 3 | 2 | 0 | 2 | 11921.5770 | -0.0006 |
| 4 | 2 | 3 | 4 | 1 | 4 | 12047.5280 | -0.0030 |
| 6 | 0 | 6 | 5 | 1 | 4 | 12048.1505 | 0.0022  |
| 4 | 2 | 2 | 4 | 1 | 4 | 12115.8746 | 0.0026  |
| 5 | 2 | 4 | 5 | 1 | 5 | 12435.5001 | 0.0008  |
| 5 | 2 | 3 | 5 | 1 | 5 | 12594.0381 | 0.0038  |
| 3 | 1 | 2 | 2 | 0 | 2 | 12830.5757 | -0.0008 |
| 6 | 2 | 5 | 6 | 1 | 6 | 12903.8352 | 0.0007  |
| 6 | 2 | 4 | 6 | 1 | 6 | 13217.8475 | 0.0002  |
| 8 | 1 | 7 | 7 | 2 | 5 | 13680.9129 | -0.0004 |
| 5 | 1 | 5 | 4 | 1 | 4 | 13957.9085 | 0.0003  |
| 8 | 1 | 7 | 7 | 2 | 6 | 14237.8893 | -0.0003 |
| 5 | 0 | 5 | 4 | 0 | 4 | 14265.2471 | 0.0003  |
| 6 | 0 | 6 | 5 | 1 | 5 | 14317.8708 | 0.0014  |
| 5 | 2 | 4 | 4 | 2 | 3 | 14345.8766 | 0.0001  |
| 5 | 3 | 3 | 4 | 3 | 2 | 14371.5552 | -0.0008 |
| 5 | 3 | 2 | 4 | 3 | 1 | 14373.3634 | -0.0015 |
| 5 | 2 | 3 | 4 | 2 | 2 | 14436.0710 | 0.0004  |
| 4 | 1 | 4 | 3 | 0 | 3 | 14499.1373 | -0.0003 |
| 5 | 1 | 4 | 4 | 1 | 3 | 14713.2633 | 0.0003  |

---

|   |   |   |   |   |   |            |         |
|---|---|---|---|---|---|------------|---------|
| 6 | 1 | 6 | 5 | 1 | 5 | 16737.8923 | -0.0002 |
| 9 | 1 | 8 | 8 | 2 | 6 | 16781.7465 | 0.0009  |
| 2 | 2 | 1 | 1 | 1 | 0 | 16948.0709 | -0.0019 |
| 2 | 2 | 0 | 1 | 1 | 0 | 16952.6482 | -0.0013 |
| 5 | 1 | 5 | 4 | 0 | 4 | 17017.9147 | 0.0008  |
| 6 | 0 | 6 | 5 | 0 | 5 | 17070.5367 | 0.0001  |
| 2 | 2 | 1 | 1 | 1 | 1 | 17099.6078 | -0.0007 |
| 2 | 2 | 0 | 1 | 1 | 1 | 17104.1856 | 0.0004  |
| 6 | 2 | 5 | 5 | 2 | 4 | 17206.2269 | -0.0008 |
| 6 | 3 | 4 | 5 | 3 | 3 | 17250.3838 | -0.0006 |
| 6 | 3 | 3 | 5 | 3 | 2 | 17255.1923 | -0.0015 |
| 6 | 2 | 4 | 5 | 2 | 3 | 17361.7061 | 0.0006  |
| 7 | 0 | 7 | 6 | 1 | 6 | 17433.2641 | -0.0004 |
| 6 | 1 | 5 | 5 | 1 | 4 | 17641.3966 | 0.0002  |
| 5 | 1 | 4 | 4 | 0 | 4 | 19287.6332 | -0.0018 |
| 6 | 1 | 6 | 5 | 0 | 5 | 19490.5615 | 0.0019  |
| 7 | 1 | 7 | 6 | 1 | 6 | 19512.2920 | -0.0010 |
| 3 | 2 | 2 | 2 | 1 | 1 | 19667.9678 | 0.0005  |
| 3 | 2 | 1 | 2 | 1 | 1 | 19690.8191 | 0.0004  |
| 7 | 0 | 7 | 6 | 0 | 6 | 19853.2869 | -0.0007 |

**Table S33.** Assigned transitions for the parent species of conformer VIII of DAE.

| J' | K <sub>a</sub> ' | K <sub>c</sub> ' | J'' | K <sub>a</sub> '' | K <sub>c</sub> '' | $\nu_{\text{obs}}/\text{MHz}$ | $\nu_{\text{obs}} - \text{calc}$ |
|----|------------------|------------------|-----|-------------------|-------------------|-------------------------------|----------------------------------|
| 1  | 1                | 1                | 0   | 0                 | 0                 | 6646.8503                     | 0.0022                           |
| 4  | 0                | 4                | 3   | 1                 | 3                 | 7414.1017                     | -0.0010                          |
| 3  | 1                | 3                | 2   | 1                 | 2                 | 8325.7737                     | 0.0000                           |
| 3  | 0                | 3                | 2   | 0                 | 2                 | 8381.3697                     | 0.0003                           |
| 3  | 2                | 2                | 2   | 2                 | 1                 | 8382.7878                     | 0.0029                           |
| 3  | 2                | 1                | 2   | 2                 | 0                 | 8383.8922                     | 0.0029                           |

---

|   |   |   |   |   |   |            |         |
|---|---|---|---|---|---|------------|---------|
| 3 | 1 | 2 | 2 | 1 | 1 | 8438.9844  | 0.0011  |
| 7 | 1 | 6 | 6 | 2 | 5 | 8464.6614  | -0.0021 |
| 2 | 1 | 2 | 1 | 0 | 1 | 9403.3226  | -0.0003 |
| 5 | 0 | 5 | 4 | 1 | 4 | 10278.4113 | -0.0005 |
| 8 | 2 | 6 | 8 | 1 | 7 | 11001.6727 | 0.0019  |
| 4 | 1 | 4 | 3 | 1 | 3 | 11100.6038 | -0.0004 |
| 7 | 2 | 5 | 7 | 1 | 6 | 11126.4021 | 0.0010  |
| 4 | 0 | 4 | 3 | 0 | 3 | 11173.7456 | 0.0004  |
| 4 | 2 | 3 | 3 | 2 | 2 | 11176.7032 | 0.0001  |
| 4 | 3 | 2 | 3 | 3 | 1 | 11177.9862 | -0.0011 |
| 4 | 3 | 1 | 3 | 3 | 0 | 11177.9924 | -0.0025 |
| 4 | 2 | 2 | 3 | 2 | 1 | 11179.4629 | 0.0005  |
| 6 | 2 | 4 | 6 | 1 | 5 | 11240.8103 | -0.0036 |
| 4 | 1 | 3 | 3 | 1 | 2 | 11251.5062 | 0.0010  |
| 5 | 2 | 3 | 5 | 1 | 4 | 11342.8155 | 0.0013  |
| 4 | 2 | 2 | 4 | 1 | 3 | 11430.5939 | 0.0013  |
| 3 | 2 | 1 | 3 | 1 | 2 | 11502.6380 | 0.0026  |
| 2 | 2 | 0 | 2 | 1 | 1 | 11557.7274 | -0.0019 |
| 2 | 2 | 1 | 2 | 1 | 2 | 11670.6878 | -0.0015 |
| 3 | 2 | 2 | 3 | 1 | 3 | 11727.6983 | -0.0022 |
| 4 | 2 | 3 | 4 | 1 | 4 | 11803.7980 | -0.0012 |
| 5 | 2 | 4 | 5 | 1 | 5 | 11899.0528 | -0.0010 |
| 6 | 2 | 5 | 6 | 1 | 6 | 12013.5449 | 0.0006  |
| 3 | 1 | 3 | 2 | 0 | 2 | 12141.0114 | -0.0002 |
| 7 | 2 | 6 | 7 | 1 | 7 | 12147.3616 | 0.0015  |
| 8 | 2 | 7 | 8 | 1 | 8 | 12300.5961 | 0.0003  |
| 6 | 0 | 6 | 5 | 1 | 5 | 13157.9195 | 0.0015  |
| 5 | 1 | 5 | 4 | 1 | 4 | 13875.0731 | 0.0000  |
| 5 | 0 | 5 | 4 | 0 | 4 | 13964.9140 | 0.0006  |
| 5 | 2 | 4 | 4 | 2 | 3 | 13970.3280 | 0.0004  |
| 5 | 3 | 3 | 4 | 3 | 2 | 13972.5259 | -0.0016 |

---

---

|   |   |   |   |   |   |            |         |
|---|---|---|---|---|---|------------|---------|
| 5 | 4 | 2 | 4 | 4 | 1 | 13973.1172 | 0.0001  |
| 5 | 4 | 1 | 4 | 4 | 0 | 13973.1172 | 0.0000  |
| 5 | 2 | 3 | 4 | 2 | 2 | 13975.8406 | 0.0003  |
| 5 | 1 | 4 | 4 | 1 | 3 | 14063.6195 | 0.0009  |
| 4 | 1 | 4 | 3 | 0 | 3 | 14860.2437 | -0.0030 |
| 7 | 0 | 7 | 6 | 1 | 6 | 16051.2786 | -0.0006 |
| 6 | 1 | 6 | 5 | 1 | 5 | 16649.0951 | 0.0005  |
| 6 | 0 | 6 | 5 | 0 | 5 | 16754.5791 | 0.0000  |
| 6 | 2 | 5 | 5 | 2 | 4 | 16763.5853 | 0.0001  |
| 6 | 3 | 4 | 5 | 3 | 3 | 16767.0901 | 0.0006  |
| 6 | 3 | 3 | 5 | 3 | 2 | 16767.1600 | -0.0001 |
| 6 | 4 | 3 | 5 | 4 | 2 | 16767.6371 | -0.0026 |
| 6 | 4 | 2 | 5 | 4 | 1 | 16767.6371 | -0.0027 |
| 6 | 2 | 4 | 5 | 2 | 3 | 16773.2178 | 0.0005  |
| 6 | 1 | 5 | 5 | 1 | 4 | 16875.2174 | -0.0001 |
| 2 | 2 | 1 | 1 | 1 | 0 | 17183.6090 | -0.0012 |
| 2 | 2 | 0 | 1 | 1 | 1 | 17221.6359 | 0.0012  |
| 5 | 1 | 5 | 4 | 0 | 4 | 17561.5751 | 0.0006  |
| 8 | 0 | 8 | 7 | 1 | 7 | 18956.9642 | 0.0023  |
| 9 | 3 | 6 | 9 | 2 | 7 | 19296.1521 | -0.0003 |
| 7 | 3 | 4 | 7 | 2 | 5 | 19332.9776 | -0.0002 |
| 6 | 3 | 3 | 6 | 2 | 4 | 19342.9300 | 0.0011  |
| 5 | 3 | 2 | 5 | 2 | 3 | 19348.9865 | 0.0005  |
| 4 | 3 | 1 | 4 | 2 | 2 | 19352.2723 | 0.0001  |
| 4 | 3 | 2 | 4 | 2 | 3 | 19356.4011 | -0.0020 |
| 5 | 3 | 3 | 5 | 2 | 4 | 19358.6029 | -0.0002 |
| 6 | 3 | 4 | 6 | 2 | 5 | 19362.1088 | 0.0013  |
| 7 | 3 | 5 | 7 | 2 | 6 | 19367.3740 | -0.0005 |
| 7 | 1 | 7 | 6 | 1 | 6 | 19422.5868 | -0.0005 |
| 7 | 0 | 7 | 6 | 0 | 6 | 19542.4557 | -0.0002 |

---

**Table S34.** Assigned transitions for the parent species of conformer IX of DAE.

| J' | K <sub>a</sub> ' | K <sub>c</sub> ' | J'' | K <sub>a</sub> '' | K <sub>c</sub> '' | V <sub>obs</sub> /MHz | V <sub>obs</sub> - calc |
|----|------------------|------------------|-----|-------------------|-------------------|-----------------------|-------------------------|
| 11 | 1                | 11               | 11  | 0                 | 11                | 10225.7512            | 0.0012                  |
| 10 | 1                | 10               | 10  | 0                 | 10                | 10268.2169            | 0.0001                  |
| 9  | 1                | 9                | 9   | 0                 | 9                 | 10306.9499            | -0.0030                 |
| 5  | 1                | 5                | 5   | 0                 | 5                 | 10423.9046            | 0.0011                  |
| 4  | 1                | 4                | 4   | 0                 | 4                 | 10443.5053            | 0.0016                  |
| 3  | 1                | 3                | 3   | 0                 | 3                 | 10459.2071            | 0.0010                  |
| 2  | 1                | 2                | 2   | 0                 | 2                 | 10470.9964            | 0.0005                  |
| 1  | 1                | 1                | 1   | 0                 | 1                 | 10478.8593            | -0.0025                 |
| 1  | 1                | 0                | 1   | 0                 | 1                 | 10486.7892            | -0.0018                 |
| 2  | 1                | 1                | 2   | 0                 | 2                 | 10494.7833            | 0.0006                  |
| 3  | 1                | 2                | 3   | 0                 | 3                 | 10506.7797            | 0.0020                  |
| 4  | 1                | 3                | 4   | 0                 | 4                 | 10522.7871            | 0.0020                  |
| 5  | 1                | 4                | 5   | 0                 | 5                 | 10542.8159            | -0.0011                 |
| 6  | 1                | 5                | 6   | 0                 | 6                 | 10566.8900            | 0.0013                  |
| 7  | 1                | 6                | 7   | 0                 | 7                 | 10595.0161            | -0.0018                 |
| 8  | 1                | 7                | 8   | 0                 | 8                 | 10627.2247            | -0.0012                 |
| 9  | 1                | 8                | 9   | 0                 | 9                 | 10663.5391            | 0.0022                  |
| 10 | 1                | 9                | 10  | 0                 | 10                | 10703.9764            | -0.0009                 |
| 11 | 1                | 10               | 11  | 0                 | 11                | 10748.5778            | 0.0002                  |
| 1  | 1                | 1                | 0   | 0                 | 0                 | 12340.2435            | -0.0010                 |
| 1  | 1                | 0                | 0   | 0                 | 0                 | 12348.1713            | -0.0024                 |
| 2  | 1                | 2                | 1   | 0                 | 1                 | 14193.7543            | 0.0011                  |
| 2  | 1                | 1                | 1   | 0                 | 1                 | 14217.5403            | 0.0003                  |
| 3  | 1                | 3                | 2   | 0                 | 2                 | 16043.3226            | 0.0008                  |
| 3  | 1                | 2                | 2   | 0                 | 2                 | 16090.8929            | -0.0004                 |
| 4  | 1                | 4                | 3   | 0                 | 3                 | 17888.9539            | 0.0005                  |
| 4  | 1                | 3                | 3   | 0                 | 3                 | 17968.2343            | -0.0005                 |
| 5  | 1                | 5                | 4   | 0                 | 4                 | 19730.6548            | -0.0001                 |

**Appendix 5:** Non-covalent interaction (NCI) isosurfaces for the conformers of DAS and DAE.

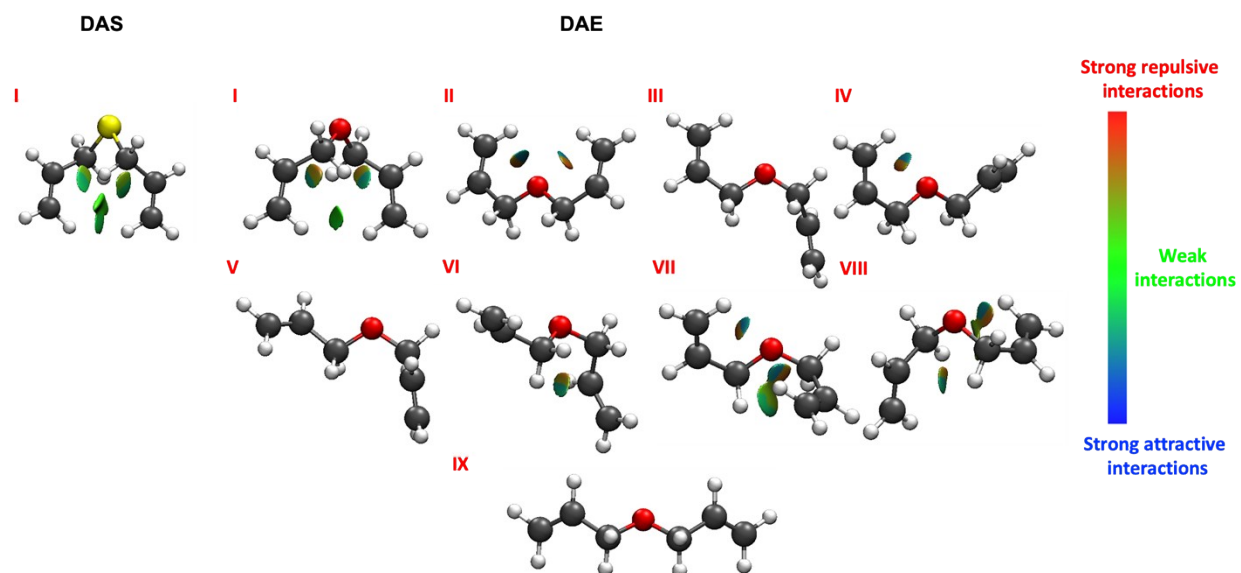

**Figure S1.** NCI isosurfaces ( $s = 0.05$ , color scale for  $-0.02 < \rho < 0.02$  au) for the one and nine observed conformers for DAS and DAE respectively.



**Appendix 6:** Kraitchman coordinates of conformers I of DAS and DAE.

**Table S35.** Kraitchman coordinates of conformer I of DAS and DAE along with their uncertainties.

| DAS              | X        | dX      | Y        | dY      | Z        | dZ      |
|------------------|----------|---------|----------|---------|----------|---------|
| <sup>34</sup> S  | -0.00000 | 0.00000 | -1.53264 | 0.00098 | 0.00000  | 0.00000 |
| <sup>13</sup> C1 | 1.11607  | 0.00134 | -0.35177 | 0.00426 | -0.82730 | 0.00181 |
| <sup>13</sup> C2 | 1.97373  | 0.00076 | 0.37652  | 0.00398 | 0.14761  | 0.01016 |
| <sup>13</sup> C3 | 1.93957  | 0.00077 | 1.71659  | 0.00087 | 0.28120  | 0.00533 |
| <sup>13</sup> C4 | -1.11607 | 0.00134 | -0.35177 | 0.00426 | 0.82730  | 0.00181 |
| <sup>13</sup> C5 | -1.97373 | 0.00076 | 0.37652  | 0.00398 | -0.14761 | 0.01016 |
| <sup>13</sup> C6 | -1.93957 | 0.00077 | 1.71659  | 0.00087 | -0.28120 | 0.00533 |

  

| DAE              | X        | dX      | Y        | dY      | Z        | dZ      |
|------------------|----------|---------|----------|---------|----------|---------|
| <sup>13</sup> C1 | 0.93096  | 0.00161 | -0.65621 | 0.00229 | 0.72648  | 0.00207 |
| <sup>13</sup> C2 | 1.89900  | 0.00079 | 0.06520  | 0.02301 | -0.17530 | 0.00856 |
| <sup>13</sup> C3 | 2.10482  | 0.00071 | 1.38681  | 0.00108 | -0.10214 | 0.01469 |
| <sup>13</sup> C4 | -0.93096 | 0.00161 | -0.65621 | 0.00229 | -0.72648 | 0.00207 |
| <sup>13</sup> C5 | -1.89900 | 0.00079 | 0.06520  | 0.02301 | 0.17530  | 0.00856 |
| <sup>13</sup> C6 | -2.10482 | 0.00071 | 1.38681  | 0.00108 | 0.10214  | 0.01469 |

**Appendix 7:** Natural bond orbitals (NBO) results for conformer I of DAS and DAE.

**Table S36.** NBO results for conformers I of DAS and DAE and conformer XXIV and II of DAS and DAE, respectively.

| DAS I                                                           |           | DAE I                                                           |           |
|-----------------------------------------------------------------|-----------|-----------------------------------------------------------------|-----------|
| Interaction                                                     | E (kJmol) | Interaction                                                     | E(kJ/mol) |
| LP <sub>1</sub> (S) → σ* <sub>C<sub>1</sub>-C<sub>2</sub></sub> | 2.4       | LP <sub>1</sub> (O) → σ* <sub>C<sub>1</sub>-C<sub>2</sub></sub> | 3.7       |
| LP <sub>2</sub> (S) → σ* <sub>C<sub>1</sub>-C<sub>2</sub></sub> | 15.6      | LP <sub>2</sub> (O) → σ* <sub>C<sub>1</sub>-C<sub>2</sub></sub> | 25.2      |
| LP <sub>1</sub> (S) → σ* <sub>C<sub>4</sub>-C<sub>5</sub></sub> | 2.4       | LP <sub>1</sub> (O) → σ* <sub>C<sub>4</sub>-C<sub>5</sub></sub> | 3.7       |
| LP <sub>2</sub> (S) → σ* <sub>C<sub>4</sub>-C<sub>5</sub></sub> | 15.6      | LP <sub>2</sub> (O) → σ* <sub>C<sub>4</sub>-C<sub>5</sub></sub> | 25.2      |
| LP <sub>2</sub> (S) → π* <sub>C<sub>4</sub>-C<sub>5</sub></sub> | 8.2       | LP <sub>2</sub> (O) → π* <sub>C<sub>4</sub>-C<sub>5</sub></sub> | 5.0       |
| LP <sub>2</sub> (S) → π* <sub>C<sub>5</sub>-C<sub>6</sub></sub> | 8.2       | LP <sub>2</sub> (O) → π* <sub>C<sub>5</sub>-C<sub>6</sub></sub> | 5.0       |
| LP <sub>1</sub> (S) → σ* <sub>C<sub>1</sub>-H</sub>             | 13.7      | LP <sub>1</sub> (O) → σ* <sub>C<sub>1</sub>-H</sub>             | 4.7       |
| LP <sub>1</sub> (S) → σ* <sub>C<sub>4</sub>-H</sub>             | 13.7      | LP <sub>1</sub> (O) → σ* <sub>C<sub>4</sub>-H</sub>             | 4.7       |

  

| DAS XXIV                                                        |           | DAE II                                                          |           |
|-----------------------------------------------------------------|-----------|-----------------------------------------------------------------|-----------|
| Interaction                                                     | E (kJmol) | Interaction                                                     | E(kJ/mol) |
| LP <sub>1</sub> (S) → σ* <sub>C<sub>1</sub>-C<sub>2</sub></sub> | -         | LP <sub>1</sub> (O) → σ* <sub>C<sub>1</sub>-C<sub>2</sub></sub> | 5.5       |
| LP <sub>1</sub> (S) → σ* <sub>C<sub>4</sub>-C<sub>5</sub></sub> | -         | LP <sub>1</sub> (O) → σ* <sub>C<sub>4</sub>-C<sub>5</sub></sub> | 5.5       |
| LP <sub>1</sub> (S) → σ* <sub>C<sub>3</sub>-H</sub>             | -         | LP <sub>1</sub> (O) → σ* <sub>C<sub>3</sub>-H</sub>             | -         |
| LP <sub>1</sub> (S) → σ* <sub>C<sub>3</sub>-H'</sub>            | -         | LP <sub>1</sub> (O) → σ* <sub>C<sub>3</sub>-H'</sub>            | -         |
| LP <sub>1</sub> (S) → σ* <sub>C<sub>6</sub>-H</sub>             | -         | LP <sub>1</sub> (O) → σ* <sub>C<sub>6</sub>-H</sub>             | -         |
| LP <sub>1</sub> (S) → σ* <sub>C<sub>6</sub>-H'</sub>            | -         | LP <sub>1</sub> (O) → σ* <sub>C<sub>6</sub>-H'</sub>            | -         |
| LP <sub>1</sub> (S) → σ* <sub>C<sub>1</sub>-H</sub>             | 4.1       | LP <sub>1</sub> (O) → σ* <sub>C<sub>1</sub>-H</sub>             | 3.0       |
| LP <sub>1</sub> (S) → σ* <sub>C<sub>1</sub>-H'</sub>            | 4.1       | LP <sub>1</sub> (O) → σ* <sub>C<sub>1</sub>-H'</sub>            | 3.0       |
| LP <sub>1</sub> (S) → σ* <sub>C<sub>4</sub>-H</sub>             | 4.1       | LP <sub>1</sub> (O) → σ* <sub>C<sub>4</sub>-H</sub>             | 3.0       |
| LP <sub>1</sub> (S) → σ* <sub>C<sub>4</sub>-H'</sub>            | 4.1       | LP <sub>1</sub> (O) → σ* <sub>C<sub>4</sub>-H'</sub>            | 3.0       |
| LP <sub>2</sub> (S) → π* <sub>C<sub>2</sub>-C<sub>3</sub></sub> | 0.6       | LP <sub>2</sub> (O) → π* <sub>C<sub>2</sub>-C<sub>3</sub></sub> | -         |
| LP <sub>2</sub> (S) → π* <sub>C<sub>5</sub>-C<sub>6</sub></sub> | 0.6       | LP <sub>2</sub> (O) → π* <sub>C<sub>5</sub>-C<sub>6</sub></sub> | -         |

**Appendix 8:** Geometries of conformers XXIV of DAS and conformer II of DAE

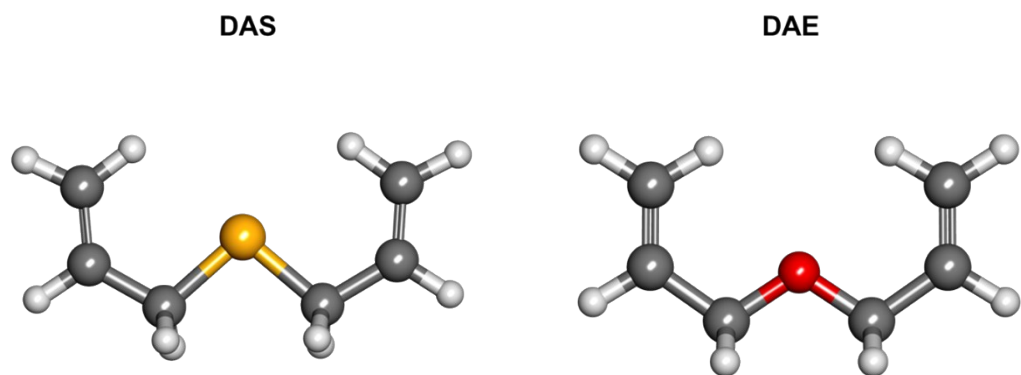

**Figure S2.** Structures of conformer XXIV and II of DAS and DAE, respectively.
